# Supplementary material for: Global health trials methodological research agenda: results from a priority setting exercise
Source: Trials. 2018 Feb 5;19:48. doi: 10.1186/s13063-018-2440-y (PMC5798175; doi:10.1186/s13063-018-2440-y)
Supplement: Supplementary file 2 — Categories for Survey Round 2 v1.0. (XLSX 96 kb) [file 13063_2018_2440_MOESM2_ESM.xlsx]

## Sheet: #LN00076
topic	why	Category
0bserver blind	0	Methods of blinding
A comparison of the clinical and microbiological profiles of Salmonella typhi malaria in Paediatric patient in University of Abuja Teaching Hospital, Gwagwalada	Malaria and Typhoid fever are the major public health challenges faced in my region, Especially the control of vector of the disease, poor sanitation, utilization of health care system.	N/A
A good database in the hospital	you can look for patients in a database	Access to and use of routine data
Ability of trial procedures to produce results that will inform real world decision making		N/A
Acceptability - better ways to understand/assess acceptability of interventions/technologies	Often simplistic assessment based on idea that the technology is/isn't acceptable, but acceptability varies between contexts/individuals and changes over time - product of the social/cultural setting as much as the technology	N/A
Access to safe abortion and prevention of unsafe abortion	Unsafe abortion contributes 30% to maternal mortality	N/A
Accessibility to health services in rural areas	0	Accessibility to health services in rural areas
Action Research		N/A
adaptative designs in mixed methods	On implementation, and cost effectiveness, sometimes do you need to know and to understand what are best ways from population.	Adaptive designs
Adaptative trials designs	Low power with limited available participants	Adaptive designs
Adaptive design	need more efficient and innovative trials	Adaptive designs
Adaptive design	It helps to reassess the progress a trial and create the environment for readjustment in the process of the trial.	Adaptive designs
adaptive design	seems useful for some questions	Adaptive designs
adaptive design		Adaptive designs
Adaptive design in early phase	0	Adaptive designs
Adaptive design trials	0	Adaptive designs
Adaptive designs	May improve efficiency	Adaptive designs
Adaptive designs		Adaptive designs
Adaptive designs		Adaptive designs
Adaptive designs that permit dropping arms and adding new interventions	0	Adaptive designs
adaptive trail designs		Adaptive designs
Adaptive trial design	If the design is inappropriate then it can affect the results	Adaptive designs
Adaptive trial design	In developing countries like mine, we have not a complete platform to conduct successfully a clinical trial , you feel you need to do everything by yourself!	Adaptive designs
adaptive trial design	0	Adaptive designs
adaptive trial design		Adaptive designs
adaptive trial design		Adaptive designs
ADAPTIVE TRIAL DESIGNS	ensuring country specific SOC taken into consideration	Adaptive designs
Adaptive Trial Designs	less time consuming, very promising in sample size calculations,	Adaptive designs
Adaptive Trial Designs	greatest need in my field currently is innovative and adaptive trial designs	Adaptive designs
Adaptive trial designs		Adaptive designs
Adaptive trial designs	Help setting up new and revised treatment strategies	Adaptive designs
Adaptive trial designs		Adaptive designs
Adaptive trial designs	Working on protocol currently	Adaptive designs
Adaptive trial designs	speed up	Adaptive designs
Adaptive trial designs		Adaptive designs
Adaptive trial designs		Adaptive designs
Adaptive trial designs		Adaptive designs
Adaptive trial designs		Adaptive designs
Adaptive trial designs	This is much needed because generating evidence is very challenging at community level where it mignt not be possible that every design is feasible.	Adaptive designs
Adaptive trial designs		Adaptive designs
Adaptive trial designs		Adaptive designs
Adaptive trial designs	more creative methods could speed up trials	Adaptive designs
Adaptive trial designs	This methods will help to focus on the trials protocols and data management.	Adaptive designs
Adaptive trial designs	There is need to adapt clinical trials to the challenges in LIC	Adaptive designs
Adaptive trial designs		Adaptive designs
adaptive trial designs		Adaptive designs
adaptive trial designs		Adaptive designs
adaptive trial designs		Adaptive designs
adaptive trial designs		Adaptive designs
adaptive trial designs		Adaptive designs
adaptive trial designs		Adaptive designs
adaptive trial designs	underused and lack of experience in general	Adaptive designs
adaptive trial designs		Adaptive designs
adaptive trial designs	This is a relatively new methodology that has not been used much especially in Sub Saharan Africa. There is limited expertise	Adaptive designs
adaptive trial designs		Adaptive designs
adaptive trial designs		Adaptive designs
adaptive trial designs		Adaptive designs
adaptive trial designs		Adaptive designs
adaptive trial designs	Investigators usually do not understand this kind of design and do not feel comfortable with some aspects of it; also sponsors do not recur very often to this kind of design	Adaptive designs
adaptive trial designs		Adaptive designs
adaptive trial designs	often forgotten	Adaptive designs
adaptive trial designs	adaptive trial designs	Adaptive designs
adaptive trial designs		Adaptive designs
adaptive trial designs		Adaptive designs
Adaptive trial designs for example using historical controls	Struggling to design a similar trial for an intervention where it may be unethical to have a control arm	Adaptive designs
Adaptive trial designs for maximising efficiency, and responsiveness to new technologies within the lifespan of a trial	0	Adaptive designs
Adaptive trial designs that are practical and can be used	Adaptive designs are not used enough and must be developed to be more practicable	Adaptive designs
Adaptive trial designs to contextual setting		Adaptive designs
Adaptive trials design	0	Adaptive designs
adaptive trials designs	required to streamline NTD-related trials with limited resources	Adaptive designs
Added value and impact of the the study		N/A
Adequate protocol design		N/A
Adequate sample size	0	Calculating sample size
Adequately compensating participants before and after particitipating in clinical trials	0	Incentives for trial participants
Adhearance to research protocol	Sometimes in developing countries it's harder for health workers to follow recruitment/randomization strategies, new invigorating ways of implementing protocols and training on protocols for implementers is needed	Adjusting for non-adherence to treatment protocol
Adherence		Adjusting for non-adherence to treatment protocol
Adherence	this is key in evaluation of outcomes yet is the hardest to enforce and measure	Adjusting for non-adherence to treatment protocol
Adjusting for clustering during analysis of clinical trials	Because some researchers ignore the clustering effect and provide misleading results	Dealing with clustering effects
Adjusting for multiple testing in subgroup analysis	Frequently overlooked subject, that introduces spurious results due to inflated Type 1 error	N/A
Adolescence reproductive health behavior	It is the vulnerable group of the population	Recruiting adolescents in clinical trials
Adolesncet girls knowlege, Attitude and practice in contraceptive use	It is a serious issue in our setting	N/A
advantages vs disadvantages of cloning		N/A
adverse effects reporting	0	Strategies for adverse event reporting
adverse events	0	Strategies for adverse event reporting
Adverse events report	0	Strategies for adverse event reporting
Adverse invents notification and reporting		Strategies for adverse event reporting
All methods to speed up the entire process from design to execution to analysis to reporting	Need to get data out as fast as possible	Methods for streamlining trials
all pharmaceutical companies should be required by law from their home countries to make the protocols of clinical trials in developing countries available in a transparent	very little transparency, and poor supervisory capacity by regulatory bodies means that pharma companies may not act ethically	N/A
allergy		N/A
alternative trial designs	0	N/A
Analyses methods	Awareness regarding novel updated approaches to analysis are needed as statistical training in LMIC is sub optimal.	N/A
Analysing complicated designs	0	N/A
ANALYSIS	IMPORTANT TO CHOOSE ADEQUATE TEST FOR OUR VARIABLES	N/A
Analysis		N/A
Analysis		N/A
Analysis		N/A
Analysis		N/A
Analysis		N/A
Analysis		N/A
Analysis	Lack of knowledge	N/A
Analysis	For a proper interpretation of the results	N/A
Analysis		N/A
Analysis		N/A
Analysis		N/A
Analysis		N/A
Analysis		N/A
Analysis	Its very relevant to have great statisticians for the analysis of the data.. The data generated is the main resource therfore if wasted and not put into great results participants time and commitment has been put to waste the same applies to resources invested in conducting the research.	N/A
Analysis	It is important you see the data and sure it is accurate	N/A
Analysis	Good analysis can use the data adequately.	N/A
Analysis	Find ways to analyse all the data collected timely, as often a lot of data is collected is not used immediately and never published or only very late.	N/A
Analysis	It gives results	N/A
Analysis		N/A
Analysis		N/A
Analysis		N/A
Analysis		N/A
Analysis	How will the analysis be done, where and how long will it take	N/A
Analysis		N/A
Analysis		N/A
Analysis		N/A
analysis		N/A
analysis	limitation of statistician	N/A
analysis	this is a crucial part because it gives the total picture of why the study was done based on the results to be obtained after the analysis.poor analysis gives fake results of trials hence unproductive trial	N/A
analysis		N/A
analysis		N/A
analysis	results of information were analysed and conclusion made	N/A
analysis		N/A
analysis		N/A
analysis	a decision on how to analyse the trials results is important	N/A
analysis	it is important.	N/A
analysis	because it establishes 'cause and effects'	N/A
Analysis ( statistical)	Most ( if not all) trials are analysed without LMIC involvement	N/A
Analysis and interpretation	0	N/A
Analysis and interpretation		N/A
Analysis and interpretation of clinical trials		N/A
Analysis and Interpretation of research data	This provides the evidence upon which decisions are to be made.	N/A
Analysis and reporting	0	N/A
analysis andinterpretation of the results from clinical trial	0	N/A
Analysis causality of adverse reaction in clinical trials	0	Strategies for adverse event reporting
Analysis of clinical trials	Very interesting area to focus because we have different methods of achieving this point	N/A
analysis of results	0	N/A
analysis of results		N/A
Analysis of safety's data	0	N/A
Analysis of the clinical trial data	0	N/A
Analysis of trials accounting for the design	0	N/A
Analysis plan	0	N/A
Analysis using perprotocol and intention to treat	0	N/A
Analysis.	Results should analysed using correct analytic methods to produce accurate results	N/A
Analytical techniques	0	N/A
analyzing collected data		N/A
Antenatal care attendance	Health Facility delivery	N/A
Anti malaria activities of Aqueous Ethanol extract of Hyptis suavalent leaves	0	N/A
ANTIBIOTICS IN TREAMENT OF DIARROHEA	0	N/A
Antibiotics Resistant Bacteria	Its an increasing global disaster	N/A
Applicability to LMIC	Setting standards that are able to be achieved outside of 1st world countries	N/A
application of adaptive designs: areas of opportunity and limitations	We need different and innovative ways to the design and conduct of trials. ~>80% of investigative interventions aren't good enough, we are too obsessed with two arm trials and we investigate interventions in populations which are too heterogenious perhaps contributing to dilution of treatment effects, technology moving fast so we should adapt to design innovation.	Adaptive designs
appropriate outcome measures/end-points	0	Choosing appropriate outcomes to measure
Appropriate outcomes to measure in trials.	0	Choosing appropriate outcomes to measure
Appropriate recruitment methodologies	Attracting and recruiting the right participant will determine if the trial succeeds or not	Methods to boost recruitment
Appropriate statistical analysis and interpretation	To make correct inferences on the outcome of trials	N/A
Appropriate statististical analysis	0	N/A
Appropriate study design re research question(s) and participants to be recruited	An inappropriate (yet academically sound) study design can have an impact on final conclusions of the study	N/A
appropriate tool for statistical anaylysis	0	N/A
Appropriate use of statistical analysis	0	N/A
Appropriately communicating trial results to participants and communities in appropriate ways	Cusious whether trial results make any sense to participants beyond the trial itself	Methods of dissemination of findings
Appropriateness of study design	This is perhaps the most crucial step	N/A
Approval of clinical trials	How does clinical trials get approved in different locations. This is one of the most common causes for delays in implementing clinical trials in resource-poor settings	N/A
archiving and storage of data	no infrastructure	N/A
are stringent safety measures taken when using biomedicine	0	N/A
Area of study	0	N/A
Aspects ethics	0	N/A
aspects influencing bias	0	N/A
Assess the impact of research (on policies, betond scholarly impact)	To understand the pertinence of research for global health	N/A
Assessing consent comprehension	0	Informed consent processes
Assessment of performanceof Solid Waste management Projects in Urban areas. A Case of municipalities in Uganda	solid waste management is becoming a major challenge in developing countries especially in municipalities	N/A
Assessment of probability from beginning to end	0	N/A
Assessment of vaccine effectivenes on Diabeticmeltes	0	N/A
Auditing	This carries out checks balances all other parameters	Methods for data management
authenticity in conduct process		N/A
Authorship	Authors need to really contribute to studies	N/A
Awarness of Clinical Trial/ Wrong assumption of Trials	specially in underdeveloped countries	Patient and public involvement
Bacteriophage Therapy	Alternative medicine for antibiotics resistant bacteria	N/A
Baseline information	with out baseline information, the chance for manipulation of information can be increased.	N/A
Basic statistics	At the origin of most common errors	N/A
Bayesian adaptive methods		Bayesian methods in trials
Bayesian statistics	0	Bayesian methods in trials
because I want to become a researcher	because I want to become a researcher	N/A
becoming paperless & using digital technologies	0	e-trials
Behavioural changes, a remedy to end HIv epidemic	The trend of HIV global has had great challenges, the prevalence rates keep on fluctuating, the behavioral changes have persistend being ignored and infection has remarkably had impact on the lives of the population globally	N/A
benefits in terms of staff training and other elements enhancing the research capacity	0	Training of research staff
Benefits to communities	Important to agree on how communities participating in clinical trials benefit from drugs/vaccines that prove to be efficacious	Incentives for trial participants
Best methods of boosting recruitment	0	Methods to boost recruitment
better involve local professionals/community	0	Community engagement
better recruitment	many clinical trials are not completed	Methods to boost recruitment
bioethical aspects		N/A
Bioethics	0	N/A
Blinded	Accurity	Methods of blinding
Blinded design so as to prevent bias of the subjects in the research activities.		Methods of blinding
BLINDING	0	Methods of blinding
Blinding	0	Methods of blinding
Blinding		Methods of blinding
Blinding	it is important to avoid bias	Methods of blinding
Blinding	Blinding has an effect on the psyche of the patient and practices to address this needs to be build into the study design	Methods of blinding
Bolstering recruitment to complex trials in surgery		Methods to boost recruitment
boosting recruitment		Methods to boost recruitment
Boosting recruitment and retention of research subjects.	Many research projects in LMIC are hindered by problems relating to recruitment and retention.	Methods to boost recruitment
Boosting recruitments	For timely completion of the trials, recruitment needs to go according to plan.	Methods to boost recruitment
bruxism	0	N/A
Budget	Because in my country, it is very difficult to find a financial support from government, organizations or individuals to maintain clinical trials or start it.	N/A
Building capacity for clinical trials in LMICs	Limited capacity in LMICs	N/A
Calculate sample size	0	Calculating sample size
Calculating sample size		Calculating sample size
Calculating sample size		Calculating sample size
Can we cure the disease? Can we stop it coming back?	0	N/A
CANCER OF BREAST		N/A
cancer surgery	0	N/A
capacity building and motivation to conduct and remain in research for researchers in LMIC	Increasingly young researchers are leaving or losing interest in research due to very low pay. There is need for standardisation or harmonisation especially for key research roles in Trials	N/A
Capacity building for new sites	We need an overall picture from every part of the globe but sites are not as experienced as others in the same consortium	N/A
Capacity development of research staff	0	N/A
Capture of real time data using common everyday devices (i.e telephone)	When capture of data is required from subjects outside of the clinical research center, a user friendly application through mobile telephone or hand-held devices can be incorporated. Subjects can be easily trained enter data required such as daily entry for diaries or treatments, etc..	Use of mobile phones to collect data
Case Control studies	This type of study is good for a rare disease	N/A
Case Control Study	Can answer questions that could not be answered through other study designs	N/A
Case-Control	not subjective	N/A
Central Recruitment site/ Pharmacy Outlet Recruitment	can play major role to boost Recruitment	Methods to boost recruitment
Centralised Monitoring	can evaluate data at any time, less burden to CRA, Risk assessment can be done	Methods for trial monitoring
Cervical cancer	0	N/A
Challenges fo MDGs	to boost Susainable development	N/A
Challenges to recruitment and follow-up for trials in LMIC settings	0	Methods to boost recruitment
Chlamidya infection and infertility	0	N/A
Choice of analysis population for non-inferiority trials	Neither ITT nor per protocol are unbiased, more work is needed to explore the options.	N/A
Choose fitting design.	A non-fitting design may either result in gathering data that cannot be used for the stats analysis, or make the study prone to a failure otherwise.	N/A
choosen appropriate outcome to measure	Because for me it very importatant to known how to reach what you want to measure and the way you can use to.	Choosing appropriate outcomes to measure
choosing appropriate outcome measures	0	Choosing appropriate outcomes to measure
Choosing appropriate outcomes to measure		Choosing appropriate outcomes to measure
Choosing appropriate outcomes to meazure	0	Choosing appropriate outcomes to measure
Choosing right trial designs	Its important from the onset to begin the trial with the right design	N/A
Choosing the appropriate outcome to measure		Choosing appropriate outcomes to measure
Clear communication from journals that release of data to investigators does not have to wait until publication	speed	Methods for streamlining trials
Clear inclusion criteria	Primerily in clinical trials	Representativeness in relation to inclusion/exclusion
Clear statistical methods	0	N/A
clients selection	clients were selected based on age and symptoms on visits	Representativeness in relation to inclusion/exclusion
clinical capcity	0	N/A
clinical grading methodology	need for improved quantitative scoring for stratification and possible sample size reduction	N/A
clinical immunology	0	N/A
Clinical randomised trials	Best reseach methodology	Randomisation methods
Clinical study report	0	Trial reporting issues
clinical trial conduct	That is very an important step for the study from we wil able to rule out the hypotesis or the objecives for whom the study were designed	N/A
clinical trial data management		Methods for data management
clinical trial design		N/A
Clinical Trial protocol	This guides the day to day implementation of the trial	N/A
Clinical trial statisitics.	One should be able to understand at least the basic statistics for trials before attempt say to analyse.	N/A
Clinical trials auditing and monitoring	the prime objective in clinical trials is the safety of the trial subjects for which effective trial auditing and monitoring is needed.	Methods for trial monitoring
clinical trials ethical issues	Some dilemmas in trials may complicate acceptability of findings	N/A
Clinical trials in practice.	One needs some taste of clinical trials in practice other than relying on the theory part of it.	N/A
clinical trials methods for diagnostics	there is an urgent need to have quality guidance for evaluations/trials for in vitro diagnostics	Trials of diagnostic tools and approaches
Clinincal trial environment management	0	N/A
Cluster randomised trials	Need for research across diverse geographical and population distribution settings	Cluster trial
cluster randomized trials		Cluster trial
Codes of conduct and rules of engagement in clinical trials		N/A
Coding		N/A
Coduct		N/A
cohort based	0	N/A
Cohort Study	Easier and cheaper than a randomized controlled trial (RCT)	N/A
cohorte	with This trial,the effect of the survey can be really notified	N/A
cold chain maintenance	0	N/A
collated literature		N/A
Collection of data	0	Methods for data management
Combination with realist approaches	Similar to above, but need to understand when/how interventions work	N/A
Communication	The right information should reach the public on time	Methods of dissemination of findings
communication of the final results	0	Methods of dissemination of findings
Community and patient interactions to increase awareness of clinical trials with a view to enhance trial participation and retention		Community engagement
Community engagement	Better engagement of communities in the process of the clinical research will help to gain social license in order to better implement the research.	Community engagement
Community engagement	Vital component for many aspects of trial. Specifically in the recruitment of patients and dissmenination of correct and understable/lay trial information	Community engagement
Community engagement	Because of the importance to avoid exploitation of communities	Community engagement
Community Engagement during recruitment	0	Methods to boost recruitment
Community Engagement during trial design, specifically protocol review and input by community representatives.		Community engagement
community involvement	very important for selecting individual from a community	Community engagement
Community involvement in trials	community participation and buy in is paramount.	Community engagement
Community mobilisation	This helps to enhance recruitment	Community engagement
Community mobilization		Community engagement
Community participation	0	Community engagement
Community Sensitization	Information reaching the community should be well discussed and interpreted	Community engagement
Comparative effectiveness studies		Pragmatic (or "effectiveness") trials
Comparing standard treatment with plant extracts	Product development	N/A
comparison of serotypes resistance genes and virulence isolated Salmonella strains in the eaten sandwiches and diarrheal infections in Burkina Faso	For know if there is a similitud under the clinicals strains and food strains	N/A
compassion use or availability of active product after the trial	often very long procedure to get product approved, and often product available at high cost	Methods for streamlining trials
Compensating research participants	There are currently disparities on how LIC and HIC compensate clinical trials particiapants	Incentives for trial participants
Compensation for participants	Participants would always expect that trialist offer them something in exchange of the specimen that they produce. This also has implication on project budgets allocated for the duration of the trial in question. There should be a way to balance the situation. Once participants feels cheated or unsatisfield, it will be difficult for futere trials to be successful.	Incentives for trial participants
compensation of minors in phase I trials	adults in most phase I are compensated for the time and transport spend oat trial sites	Incentives for trial participants
compliance of documents with EU & US laws		Methods for trial monitoring
compliance with ethics governing the research		N/A
Compliance with good clinical practice	0	N/A
CONDUCT	until a research is conducted ,researcher will not be aware of the outcome of safety issues involved in drug	N/A
CONDUCT	until a research is conducted ,researcher will not be aware of the outcome of safety issues involved in drug	N/A
Conduct	conduct allow to realise study design	N/A
Conduct	To under where and who the study will be done and who is targeted	N/A
Conduct	It will make or break the trial	N/A
Conduct	experience	N/A
Conduct		N/A
Conduct		N/A
Conduct		N/A
Conduct	I need to gain more expert knowledge in this area, especially on how to minimize inherent biases.	N/A
Conduct	There must be respect for persons, non maleficence, justice	N/A
Conduct	The ethical considerations are importance in human subjects	N/A
Conduct		N/A
Conduct		N/A
conduct	good conduct lead to good results	N/A
conduct	good conduct lead to good results	N/A
conduct	I needs to be sure of the validity of the generated results from clinical trials	N/A
conduct	Good conduct can improve the efficiency of the trials.	N/A
conduct		N/A
conduct		N/A
conduct		N/A
conduct	because it helps eliminate bias	N/A
Conduct , analysis, interpretation	0	N/A
Conduct and monitoring	0	N/A
Conduct of clinical trials		N/A
Conduct of study in busy clinics/hospital setting	Busy staff and clinics will affect the quality of data collected, but also suitable for pragmatic trial which reflect the reality of clinical care in this setting.	N/A
Conduct of trial	A lot of bottle necks are there	N/A
conduct the study	how to exactly way	N/A
Conducting	0	N/A
Conducting a trail	0	N/A
Conducting activity	0	N/A
conducting clinical trails		N/A
Conducting trial	0	N/A
Conduction		N/A
condut		N/A
confidentiality	an ethical requirement	N/A
Confidentiality reports of patients	0	N/A
Conforming to the CONSORT guidelines while reporting clinical trials	Because some researchers do not refer to the CONSORT checklist while reporting clinical trials	Trial reporting issues
Consent for hospital based clinical trials	Is there ever true voluntary consent for sick people in LIC?	Informed consent processes
CONSENTING	0	Informed consent processes
consenting and assenting procedures		Informed consent processes
consenting process	most low income countries people are forced to attend or being persuaded with money because of their vulnerability	Informed consent processes
Consenting processes	It is good to ensure that the participant understood the process, this will give smooth follow ups	Informed consent processes
Considering health systems components in implementation trials	0	N/A
Continuos monitoring and supervision with is-services trainings	This helps to make quick analysis and better corrective measures	Methods for trial monitoring
Contraceptive use	High fertility rate here	N/A
Control all kinds of bias	it is difficult in the process of implementation	N/A
Control for confounders	0	Adjustment for baseline imbalance
Controlling for contamination in clinical trials, especially for unblinded interventions	Because some researchers do not control for contamination during the conduct of clinical trials	Issues around contamination between trial arms
Cooperative-based trail	0	Community engagement
core outcome sets	choice of outcome measures is pivotal in assessing efficacy and safety	Choosing appropriate outcomes to measure
Correct interpretation of statistical analysis	0	N/A
Correct sample size.	If the sample size is insufficient, the study will either fail or get prolonged consuming more resources than planned.	Calculating sample size
Correct type of the statistical analysis.	Goes together with all the others; necessary to calculate sample size, endpoints, analyse collected data and confirm or refute the hypothesis.	N/A
Correction of any mistake by Enumerators on the field	To make enumerators realize their mistake and maintain authentication	Methods for data management
cost / Finances	Who will pay for the cost ?	N/A
Cost effective	In terms of staffing availability, facilities etc.	Methods for economic analysis
Cost effectiveness aspects	0	Methods for economic analysis
Cost-effectiveness trials	It is very important for decision makers in LMICs to decide on expensive drugs	Methods for economic analysis
Counseling of participants and consent		Informed consent processes
CRA's responsibility		Training of research staff
CRF and database design	Rarely teached in academic environment	Methods for data capture
CRF DESIGN		Methods for data capture
CRF should be as simple as posssible, but answer the promlem studied	Complex CRF will increase mistake rate and in exclusion sample	Methods for data capture
Criteria and management of recruitment	important to have appropriate study participants and feasibility	Methods to boost recruitment
critical reflections on the role of trials and the evidence they produce in the global health agenda	trials are not the only type of evidence we need to inform decision making in global health, yet they are often promoted and prioritised at the expense of other forms of knowledge production. we need to attempt to level the playing field and understand the role of critical methodologies (critical global health, anthropology, political science, etc) in informing trials and the evidence they produce	N/A
Cross Check the Participants	To ensure the objective of the project is being reached	N/A
Cross sectional	0	N/A
Cross Sectional Studies	I feel this type of studies are of paramount importance especially in low middle income countries because the data collected can be used for other types of research	N/A
Cross sectional study design	We had to determine the prevalence of UTIs and treatment outcomes among a certain population	N/A
Cultural context of the population some	Feasibility of the clinical trial through experience some of the HIC are not applicable to LMIC	Impact of cultural context on acceptability of clinical trials and its methods
Daily Quality checks of data	There needs to be a team to check the data collected each day so as to resolve any discrepancy real time	Methods for data management
Data Analysis		N/A
Data analysis	results of the study will depend on the good data analysis method	N/A
Data analysis	There minimal support and people with good skills in this area	N/A
Data analysis	to have correct results and good interpretation	N/A
Data analysis		N/A
Data analysis	It is critical to learn how intention-to-treat and other analyses are conducted.	N/A
Data analysis		N/A
Data analysis	results of the study will depend on the good data analysis method	N/A
data analysis	Data can be interpreted different, depending on the variables. It is possible to remark new trends of the data, not predicted before the initiation of the study.	N/A
data analysis		N/A
data analysis	Data can be interpreted different, depending on the variables. It is possible to remark new trends of the data, not predicted before the initiation of the study.	N/A
data analysis	it has to be specific for data collected	N/A
Data analysis and reporting	0	N/A
data analysis and results dissemination	0	N/A
Data analysis plan	As the SOP this should be prepared forehand to avoid any disparities or change in plans later.	N/A
data analysis techniques	0	N/A
Data capturing tools and best practices		Methods for data capture
data cleaning procedure and principal	0	Methods for data management
data collect	an error in collecting data will impact in the results	Methods for data capture
Data Collection	Should be as soon as possible in order not to lose data	Methods for data capture
Data collection	It was very interested when i was suppliying the supplement to see how the kids improve compared with before starting. Even their mother they was was praising the supplements. Even uptodate some of them they asking feedback of the trial.	Methods for data capture
data collection	data that are collected and never analysed	Methods for data management
Data collection tool	Who and how the data will be collected ?	Methods for data capture
Data entry	To record accurate and keep the data Confidential because the SCD disease in our country it is not know with many people so their is still stigma in this diseses	Methods for data management
data handling	0	Methods for data management
Data interpretation	0	N/A
data interpretation	There are important articles which are not accessible for moderate income countries.	N/A
Data interpretation from adaptative trials designs for small populacional	Because it determine the correct way to use the data collected	Adaptive designs
Data Management	0	Methods for data management
Data Management		Methods for data management
Data management	Many Technologies available	Methods for data management
Data management	High quality data collection and management is crucial for useful outcome of clinical trials. Good data management is often ignored or sub-standard in clinical trials in resource poor settings	Methods for data management
Data management		Methods for data management
Data management		Methods for data management
Data management		Methods for data management
Data management	This is what determines whether the trial was successful or not.	Methods for data management
Data management		Methods for data management
Data management	Computerised data management system may be difficult to implemented at site level especially at remote area or edemic period where infrastructures and trained staff are not adequate, which push us to develop something as simple and user friendly as possible.	Methods for data management
Data management	Frequently overlooked	Methods for data management
Data management	Limited expertise for data management in LMIC	Methods for data management
Data management	data is the one which produces results	Methods for data management
data management	0	Methods for data management
data management		Methods for data management
data management		Methods for data management
Data quality and completeness	makes analysis less cumbersome - less statistical manipulation	Methods for data management
Data Quality Assurance	Data quality in developing countries are mainly the main problems. sometimes, political issues affect the quality of the data, sometimes lack of monitoring lack proper monitoring and evaluation affect the quality of data and sometimes inappropriate capacity (design, data collection, analysis and reporting) affect the quality.	Methods for data management
Data Safety and Monitoring Board	An active and independent group to overview the trial is absolutely necessary.	Methods for trial monitoring
Data Security and intergrity	Protects the integrity of the participants	Methods for data management
Data sharing infrastructures	0	Data sharing
data tools		Methods for data capture
Data utilisation and storage ( especially after Trials)	0	N/A
Database design	Good studies need good data - well entered and backed up	Methods for data management
Dealing with clustering effect	some population are not equally distributed	Dealing with clustering effects
Dealing with clustering effects		Dealing with clustering effects
Dealing with missing data	Cosequences of missing data in clinical trials are detrimental and how to deal with this issue is very important	Methods for dealing with missing data
Deciding/defining complex interventions	Defining clearly "what they are" requires educating the people, users (researchers), reviewers and funders.	Complex interventions
Define correct objectives.	If the objectives are not clear and cannot be used to define endpoints, the study is a waste of time and money.	Choosing appropriate outcomes to measure
Define the most useful hypothesis	To find the greatest clinical impact	Identifying and prioritising relevant research topics
Define Traslational and clinical endpoints	To improve multi-disciplinar teams and approach to problem solving	Choosing appropriate outcomes to measure
Defining wortwhile problems in a population	To know how to identify real needs worthy of study	Identifying and prioritising relevant research topics
Definition of study population profile (inclusion/exclusion criteria)	0	Representativeness in relation to inclusion/exclusion
Demographic dynamics	0	Representativeness in relation to inclusion/exclusion
descriptive	the elementary design	N/A
DESIGN	IS A KEY OF THE STUDY	N/A
DESIGN	design :makes better understanding of mechanism of the drug made of different composition	N/A
Design		N/A
Design	Since it depends on the question , How it can be tested?	N/A
Design		N/A
Design	It is the core of research ans stakeholders needs to be engaged at this level	N/A
Design	It impacts on the overall outcome of the trial	N/A
Design	Mainly because a poor designed study is unethical. It may expose participants to undesired harm than anticpated	N/A
Design	Because I often have the ideas but the design I miss, then it will participate in my training	N/A
Design		N/A
Design		N/A
Design	Need to consider types of trial most approriate to the setting	N/A
Design	This is the most crucial area after conceptualisation because a badly designed study yields unreliable data.	N/A
Design	The design should be tailored to the context-specific of the study population	N/A
Design		N/A
Design		N/A
Design	Design is the soul of the clinical trials.	N/A
Design	It is important for accompanying research	N/A
Design	I would like to learn how to design appropriate clinical trials in the area of infectious diseases, particularly HIV and co-infections with appropriate community controls.	N/A
Design	If the design is faulty then it is not scientifically valid and therefore not ethical	N/A
Design		N/A
Design		N/A
Design		N/A
design		N/A
design	Clinical trial design should be clearly written and have procedures to allow easy comphrension of the study, thus promoting compliance with the protocol	N/A
design	most important	N/A
design		N/A
design	I think in low income countries its very important to design trials that reflect the actual situation on the ground to have trials that give the best estimation of effects of treatments/ equipments/interventions	N/A
design		N/A
design		N/A
design		N/A
design		N/A
design	it helps limit errors that are avoidable	N/A
Design and analysis of pilot study	this is like the feasability of the study in the areas.	N/A
Design and analysis of pilot/feasibility trials		Early phase trials
design and conduct of clinical trials in developing countries	The quality of RCTs are flawed in these countries	N/A
Design and consenting issues	Clinical trialist often are not able to really explain or communicate the design of the trial to participant cleary. Participants often finds problem with trialist with issues of blood draw and the units or amount taken.This is a serious area which attention should be given	Informed consent processes
Design in diseases without gold standar treatment	0	N/A
design methodology	Today, the protocols are very restricted and it is very difficult to be improved during the trial (when new unexpected observations occur)	N/A
Design of clinical trials	Appropriate trial design will lead to successful implementation at the right cost,time and quality	N/A
Design of trial	0	N/A
Design of trials adapted for reaching a rapid conclusion during epidemics	Experience from Ebola outbreak - limitations of RCT and stepped wedge	Adaptive designs
Design research methodology that meet the objectives.	0	N/A
Design to explain mechanisms of intervention	Rather than just highlighting "what", i.e. x causes y, we need more trials that define mediators of what, "the why" and "the how"	N/A
Design. analysis and interpretations	it is important for conducting proper trials and making proper conclusions	N/A
Designing	0	N/A
Designing a clinical trail in low budget	0	N/A
Designing of Clinical Trials	I am have an interest in this area and I am learning from experts	N/A
Designing of clinical trials/ studies	A good design will provide a best outcome	N/A
Designs methodology	0	N/A
designs of behavioral interventions	0	Behavioural intervention trials
Dessimination of trial results	Often, the local areas where the research was conducted do not hear or informed about the outcome of the trial. As most of them are illiterates they do not have access to any other form to get to know the results.	Methods of dissemination of findings
determination of Reliable denominators	enable compute rate of diseases	N/A
determining study population	helps in generalisation of study	Representativeness in relation to inclusion/exclusion
develop applications on mobile phone for recruiting, monitoring, evaluation of adverse event	to increase safety and accuracy of the data than can be immediately communicated to the investigator, sponsor, ethics committee, health authorities	Use of mobile phones to collect data
develop pharmacovigilance platform	to allow active tracking of adverse events of medicinal product with conditional marketing authorisation	Strategies for adverse event reporting
Develop protocol of clinical trials for higher health science colleges in developing countries	0	N/A
Developing the hypothesis	Main backbone of study	Choosing appropriate outcomes to measure
Developing the study objectives	Which is the steering for the further process of study	Choosing appropriate outcomes to measure
Diabetes	0	N/A
DIABETES AND HYPERTENSION INTERVENTION	0	N/A
Diarrhoea	0	N/A
DIARRHOEA Diseases	Because this one of the highest killer diseases in my country and receive less government funding because of lack of evidence which may help in policy making and contribute prioritising research for such diseases	N/A
DIARROHEA IN UNDER FIVE	0	N/A
discontinuing or modifying allocated interventions	Ex: how to define a drug dose change in response to harms	Adaptive designs
Disease burden		N/A
Disemination	sharing resultds back to the stakeholders is paramount	Methods of dissemination of findings
Disign	lack of experience and know how	N/A
Dissemination	0	Methods of dissemination of findings
Dissemination of results locally	0	Methods of dissemination of findings
Double blinded clinical trial	Designed by the London School of Hygiene and Tropical Medicine for an international trial, I was a PI and National coordinator for the DRC	Methods of blinding
Double Checking	To ensure the integrity of the data that enumerator reports.	Quality control of statistical analysis
dropouts not properly documented	possible bias in interpretation	Methods to minimise attrition
Early phase trials in low income setting	When is it appropriate/not-appropriate. What is accaptable in settings with limitted health care (and for example no intensive care)	Early phase trials
Economic efficiency	0	Methods for economic analysis
EDC	0	Methods for electronic data capture
Edition	Publication	Methods of dissemination of findings
EDP	0	N/A
Effect of Mobile Phone Text Messages Reminders on Uptake of Routine Immunization among Children in Pakistan	0	N/A
Efficacy	0	Explanatory ("or efficacy") trials
efficient conduct	Conduct is how the trial design be achieved and quality control relies on it. In most of the time, realworld conduction experiences give feedbacks to the trial design itself .	N/A
Electronic informed consent	Makes more easy, trust and traceable the informed consent	Informed consent processes
Eligibility Criteria	The inclusion and exclusion are key to getting what we are looking for	Representativeness in relation to inclusion/exclusion
Eligibility screening		Representativeness in relation to inclusion/exclusion
Eliminating research bias	Accurate of research finding strives when bias is reduced or eliminated in MLIC	N/A
Embedding clinical trials into the healthcare system such that capacity development is not wasted.	Often a site is set up for a particular trial then the capacity development comes to nought when the trial ends, we could do more to embed research into a system to ensure these gains are not lost and that more (relevant) research is conducted at such institutions for the greater good.	N/A
Embedding clinical trials into the healthcare system such that patients understand research better, which could help with recruitment, retention and quality data collection	In high income settings patients are often exposed to information about research within an institution (through leaflets, patient groups etc.). In LMICs in my experience this does not happen routinely, which means it can be challenging to help patients understand research, including during recruitment but also as regards them reporting information accurately.	Methods to boost recruitment
emergency situation trials	0	Trials in emergency settings
Emphasizing safety first	To control adverse reaction and effectiveness of the therapy	Strategies for adverse event reporting
Empowered personnel	Staff who are well informed/trained contribute to the success of the study	Training of research staff
Endpoint selection	Key to interpreting data	Choosing appropriate outcomes to measure
Engaging stakeholders		Community engagement
Enrollement	enrolled patients are usually vulnerable without knowledge on the topic of the research. it is important the their informed consent will really be informed	Informed consent processes
enrollment and patient groups	National databases do not exist and information is unavailable to people looking for volunatry enrollment	Methods to boost recruitment
Ensuring multidisciplinary approach to mental health		N/A
Ensuring that informed consent procedures are proportionate and relevant	Too often informed consent procedures are over burdensome AND confusing - in general IC should mimic the information and consent processes of routine healthcare as much as is feasible	Informed consent processes
environment for clinical trials	is not condusive as of now	N/A
Epidemiological design	Trial of the vaccine started at the end of the Ebole disease in the country, how then the efficacy of the vaccine been tried is felt	N/A
Equity of access	Social justice	N/A
Establishing importance of the clinical question		Identifying and prioritising relevant research topics
Ethic	Human research	N/A
Ethic aspects		N/A
Ethical and regulatory considerations	to protect trial subjects	N/A
Ethical approval so as not to infringe on the subject right		N/A
Ethical aspects	0	N/A
Ethical aspects		N/A
ethical clearance	Getting ethical issues sorted out help to guide the conduct of research in a scientific and standard methods	N/A
ethical clearance		N/A
Ethical conduct of clinical research	Study participants well being should be the priority of the researcher especially in Low income countries.	N/A
Ethical conduct of clinical trials		N/A
Ethical conduct with respect to participants recruitment	In LMIC poverty is a big issue with potential for inducement during recruitment	Methods to boost recruitment
Ethical considerations	Ethical considerations	N/A
ethical considerations	dealing with vulnerable population	N/A
Ethical considerations in trials involving vulnerable groups	To ensure ethical standards are met	N/A
Ethical considerations of individuals in poverty	Important to understand how to communicate and the role and potential implication lilleriate individuals might have when recruited or those in poverty - do they fully understand ethics or are they just agreeing as they have no choice (or feel they have no choice/say)	N/A
Ethical considerations when recruit participants for control/intervention groups (using mhealth).	0	N/A
ethical issues	0	N/A
Ethical issues in clinical trials, especiallt those involving communities with relatively lesser education		N/A
Ethical issues in conducting trials		N/A
Ethical matters	is necessary to understand waht is the ethical outcomes from interest conflicts	N/A
ethical training for pragmatic trials	Because ethical challenges to conduct these trials is not well understood	N/A
Ethics		N/A
Ethics		N/A
Ethics	Obviously	N/A
Ethics		N/A
Ethics		N/A
Ethics		N/A
ethics		N/A
Ethics - assessment of why people are particpating/refusing, whether they are happy with participation or coerced, whether measures to support informed, voluntary participat	More monitoring/evaluation of the trial than a research area, but methods for trials to do this routinely and relatively easily important ethically	Informed consent processes
Ethics and community engagement	Community engagement and Ethic considerations is vital	N/A
ethics and compenation	the guidelines for Clinical trials has been revised recently and brings more accountability to the Eproblemthics committees, however regulation is still a	N/A
Ethics and culture influence on clinical trials	0	N/A
Ethics and regulatory authorities	0	N/A
Ethics differences amongst countries.	Ethics appear to be stricter in Germany - hence there are delays in recruiting - there needs to be consistency.	N/A
Ethics issues	Adherence to the ethical issues is important	N/A
Ethics of clinical trials		N/A
Ethics of recruitment and conduct of the trial		N/A
Ethics of recruitment of vulnerable participants in low income settings	0	N/A
Ethics surrounding randomization of participants	0	N/A
Evaluate the effectiveness and safety of medications or medical devices		Pragmatic (or "effectiveness") trials
Evaluation of electronic data capture methods	0	Methods for electronic data capture
Evaluation of impact on policy and practice	0	N/A
Evaluetion of adaptive randonmization of clinical trials	Analysis	Adaptive randomisation
Evidence synthesis	To able to make use of the ealth of information already available on clinical trial design, conduct, analysis and interpretation	Using previous evidence to inform trial design
Expanding dissemination of research findings.	Results of research done in LIMC are not as widely disseminated as research findings from LMIC.	Methods of dissemination of findings
Experimental analytical studies, e.g. A phase II, double blind, randomized, placebo -controlled study	Reduces bias, and the results are more meaningful	Randomisation methods
Experimental subjects obtaining direct benefits from research findings	0	Incentives for trial participants
Expert Selection	Delegate well trained experts in the field to do the work	Training of research staff
Expertise for clinical trials	in low and middle income countries we have little purposeful training for people to engage in research settings and there are few people who know the importance of clinical trials and recognise the need for specific training	Training of research staff
Exploring variations in classic RCTs, i.e. Cluster randomized trials, stepped wedge designs		Stepped wedge designs
external validity		Methods for trial monitoring
Facilities	Trial must be conducted in a suitable environment	N/A
factorial trials	may be cost-effective	Factorial trials
Failed intervention or trials needs to critically reevaluate the underlie factors. No more hiding or manipulation or managing any failed trials.		Methods for trial monitoring
FAIR PAYMENT PRACTICE	0	Incentives for trial participants
FAMILY PALNNING METHODS AND EFFECTS		N/A
Family planning uptake rate , attitutes and acceptability among post-natal women in Tanzania	Majority of post-natal women complain about contraceptive use in Tanzania	N/A
Fast reporting	Reporting of AEs, SAEs, or other factors changing protocols should be made aware of promptly.	Strategies for adverse event reporting
Feasibility	Whether the trial is do-able or not Finances, ethical approvals etc	Assessing site capacity
Feasibility Analysis	0	N/A
Feasible	What can you investigate in your country/hospital	Assessing site capacity
Field Research		N/A
Field trials on use of cellphones	Public health component	Use of mobile phones to collect data
Field work	0	Training of research staff
Flexibility in participants follow-up	This will determine the retention rate	Methods to minimise attrition
Follow ups	Good retention rate depends on many factors but the main one is first interaction with participant, if they are not comfortable at first by perhaps not clarifying details or the way one responds to them will matter when making follow ups	Methods to minimise attrition
follow-up		Methods to minimise attrition
Follow-up and avoid drop out of cases	Can screw yhe whole study	Methods to minimise attrition
Follow-up of participants	People are busy, very mobile, but it is important to keep those included into the trial.	Methods to minimise attrition
Formulate the trial hypothesis correctly.	If the hypothesis is wrong, the rest of work is useless.	Choosing appropriate outcomes to measure
formulating study designs ie randomised	gives the study its strength	Randomisation methods
formulating trial protocol	It is important to get this well designed	N/A
framing of questionnaires	can lead to errors in recruitment	Questionnaire design
Frequent errors doing clinical trials		N/A
Fundamentals of clinical trials	One has to get the fundumentals of clinical trials right before any successful trial can be achieved.	Training of research staff
funding	it determine success of the research	N/A
funding	Funding is important because without adequate funding compromises is bound to happen and a good design may not be presented well	N/A
Funding clinical trials	LMIC Govts hardly have research agencies that can fund clinical trials. This has greatly affected the number and quality of clinical trials from such countries	N/A
Funding for trials	0	N/A
futility and how it affects conclusions	0	Assessment for futility
Future child bearing intention among HIV positive women		N/A
GCP adapted to low incoming countries	GCP was created by and for developed countries; many times is very hard to follow GCP in low incoming countries	N/A
GCP in emergent epidemics e.g. ebola	ex in ebola epidemic studies were conducted in parallell with emergency clinical care and GCP	N/A
GCP knowledge and understanding of research at local level	0	N/A
GCP/GCLP and ethics	To make sure that trial are conducted in ethical manner	N/A
gender balance in CT	despite some regulatory intention to decrease the bias, the female gender appears to continue to be under-represented in some therapeutic areas	Recruiting women in clinical trials
Generability	For my population	Representativeness in relation to inclusion/exclusion
General medical studies		N/A
Generalizability of findings	0	Representativeness in relation to inclusion/exclusion
Geographical Information System of malaria in Dobi, Gwagwalada Area Council Abuja		N/A
Getting the funding application right		N/A
GLP	0	N/A
Good clinical practice	Because clinical practice are different in both low income country and high income country due to the peak material lack in low income country.	N/A
Good clinical practice		N/A
Good clinical Practice / Research Ethics	Should be a priority throughout the trial to protect participants and have an ethical trial	N/A
Good data management practices	Without good data there would be no results/paper	Methods for data management
Good practices - clinical, laboratory and pharmaceutical	0	N/A
Good trial communities relationship	A good between all parties is essential for enrollment and follow up and compliance of study volunteers	Community engagement
Guaranteeing that the rights of participants are always a priority	0	N/A
GxP (good clinical, manufacturing, laboratory practices)	the entire quality standards are ignored by too many researchers	N/A
Haemorgical Fever viruses	Frequent outbreacks reported	N/A
Having a representative sample	0	Representativeness in relation to inclusion/exclusion
Health care system	Because a strong health care system can support clinical trials very well	N/A
Health Technology Device	systematic and accurate update regarding trial process	N/A
Hepatitis B, a hidden enemy	Currently, the number of people infected by Hepatitis B seem to on rapid raise, initially the vise was seen among HIV infected individuals, to day the infection has much significant impact on the life those who are not infected with HIv	N/A
HIV	0	N/A
HIV in Sudan	Increasing incedents reported	N/A
HIV prevention research	High burden of the disease in our country	N/A
HIV prevention trial design now that there is a very high standard against which to assess new products.		N/A
HIV/AIDS	0	N/A
Home management of simple malaria	Enhance treatment at community level	N/A
Honesty in all aspect in conducting clinical trial	The transparency in trial management is an key component of succes in the conduct of clinical trail	N/A
house numbering	it helps when the proper survey is meant to commence,streamline it to exact houses u need to go.	Methods to boost recruitment
How and where to publish		Methods of dissemination of findings
How are diseases and conditions diagnosed?		N/A
how design clinical trials		N/A
How participants are selected	0	Representativeness in relation to inclusion/exclusion
How should disease best be treated/cared for?		N/A
How to address patients the withdrew from a clinical but not loss-to-follow up	most researchers don't the difference	Methods for dealing with missing data
How to be inclusive of multi-morbidities	Being too reductionistic in a LMIC where morbidities are convergent does not address the question in a pragmatic manner, or include those generally most at risk	How to be inclusive of patients with multi-morbidities
How to boost receruitment	0	Methods to boost recruitment
How to conduct credible clinical trials in LMIC		N/A
How to design and conduct trials which are more towards pragmatic end of the spectrum	There is a serious dearth of prgamatic trials; all too often the trials conducted in LMIC are closer to the explanatory model and the results may bear littel relevance to what would happen were the intervention introduced in practice.	Pragmatic (or "effectiveness") trials
How to design non-inferiority trial	many researchers don't know how to design it	Non-inferiority trials
How to do a fair recruitment		Methods to boost recruitment
How to embed randomised trials in long term observational research platforms	Because we need good observational research as much as we need trials	N/A
How to followup effectively with control group, especially in Mhealth trials	Since I have difficulties to follow up with our participants when they use Mhealth intervention, especially with control group	Strategies for adverse event reporting
How to handle missing data in clinical trial	many researchers don't know how address it	Methods for dealing with missing data
How to improve conduct of trial research	This is where attrition of participants occurs and seriously affect the outcome a well conceptualised study	Methods to minimise attrition
How to incorporate pragmatic trial into daily clinical practice	In order to get close to the real effect size	Pragmatic (or "effectiveness") trials
how to obtain a sutable design	because a good design allow to have grants and allow you to have appropriate response to your research questions	N/A
How to prevent cancer in elderly	Cancer has proved A silent killer, most of the elderly succumb to different typesnpf cancers, they is need to conduct atrial on the most common typesy of cancers, the lifestyles of those affected and how to prevent occurrence	N/A
How to randomize		Randomisation methods
How to run a clinical trial in low outcomes countries	Because the resources are limited	N/A
How to write grants	To get funding	N/A
ICH standards	To be used for regulatory submissions, clinical trials needs to be designed and performed according to the highest international standards, or ICH, but knowledge about this is too often inadequate	N/A
identification and characterization of the phenotypic and genotypic strains of Salmonella	This investigation also allowed to seek the sources of contamination and sold sandwiches to evaluate the resistance of these strains to antibiotics. As an outlook, we plan conduct a full serotyping, molecular characterization and phylogenetic analysis of our strains.	N/A
Identify, map and engage all the stakeholders (at all levels) whom can influence the research	0	Methods for trial monitoring
Immunogenicity and Efficacy	0	Explanatory ("or efficacy") trials
immunology	0	N/A
IMP managment		N/A
Impact of different dosing schedules on the immunogenicity of the human rotavirus vaccine in infants in Pakistan		N/A
Impact of randomization changes or mistakes	randomization is a difficult concept to explain and so I think changes in randomization and mistakes are an important issue to consider in my setting	Randomisation methods
Impact of withholding breastfeeding at the time of vaccination on the immunogenicity of oral rotavirus vaccine	0	N/A
Implement research to policy	The purpose of the most research is to improve treatments and care.	N/A
Implementation (Conduct)	0	N/A
implementation of complex interventions	0	Complex interventions
Implementation science trials	recognise the need for cluster designs, for more pragmatism in conduct of trials in particular relating to participant selection and intervention delivery, and the incorporation of process evaluation into the conduct and analysis and interpretation of trials.	N/A
implementation science trials	important for policy and programs	N/A
Implementational trial designs	I am particularly interests in this type of research	N/A
Implications for research, policy, and practice	0	N/A
Implications of RCT on health and well-being/development of individuals (in LICS)	How does the RCT method benefit those in poverty when placed in the control group? Unfair advantage - possibly need to look at other designs where individuals eventually receive the treatment and/or ensure there is no overlap between study sites	N/A
Importance of recruiting the correct sample size in clinical studies	0	Calculating sample size
Importance of the problem and its impact	0	Identifying and prioritising relevant research topics
Improve retention and recruitment		Methods to minimise attrition
Improve the quality of the research		Methods for data management
Improved design of non-inferiority trials	Non-inferiority trials are prone to error and manipulation and better alternatives are needed	Non-inferiority trials
Improving conduct of complex intervention trials	Because many trials are actually of complex interventions but this fact is typically ignored	Complex interventions
Improving data collection mechanism	0	Methods for data management
Improving informed consent	Studies have shown that there are challenges in this area.	Informed consent processes
Improving research ethics in LMIC.	Compared to clinic trials research done in HIC, LMIC lag behind in the area of research ethics.	N/A
Improving study design	Most research in Africa are crosssectional studies . Mostly limiting and establising associations without casualities	N/A
inadequate knowledge of statistical analysis; ignoring data of those who did not complete treatment	0	N/A
Inadequately trained personnel	A few of experts that I have worked with were trained on the job i.e. Working with a few people trained locally and learning as they work. Very researchers in my country have received structured institution based training in clinical research. This also has a great impact of quality of trial studies.	Training of research staff
Incentives for participants	0	Incentives for trial participants
incentivising participants	0	Incentives for trial participants
incertives determination	for ethical reasons	Incentives for trial participants
Incidence and prevalence of pathology	0	N/A
Inclusion and exclusion criteria	Generalisability	Representativeness in relation to inclusion/exclusion
Inclusion criteria	This will determine the capacity of recruitment	Representativeness in relation to inclusion/exclusion
Inclusion/Exclusion criteria	0	Representativeness in relation to inclusion/exclusion
Incorporating community members in trial design	0	Community engagement
incorporating health systems research into trials		Access to and use of routine data
Increasing recruitment into trials		Methods to boost recruitment
Increasing uptake into clinical practice		Methods to boost recruitment
Independent reviewers should be integrated into every processes and stages of trial studies to checkmate any form of misconduct.		Methods for trial monitoring
infection		N/A
Infectious virology	My country is in an endemic area	N/A
Inform consent process	The inform consent process in LMIC setting has several concerns: explain to a low-level educated population, payment/reimbursement can be an inducement for poor people	Informed consent processes
Informed consent	0	Informed consent processes
Informed consent		Informed consent processes
Informed consent	Because participation is voluntary	Informed consent processes
Informed consent	It is important that all those who will be involved in the study are aware of the study with clear information provided to them before making informed decision to participate. CT study designs should out the pros- and Cons of the study. There shouldn't be coercion of participants.	Informed consent processes
Informed consent		Informed consent processes
Informed consent	it is important.	Informed consent processes
informed consent	in LMIC countries most recruits are illiterate and from vuilnerable populations, informed consent is often not really executed in an ethical way	Informed consent processes
informed consent	informed consent	Informed consent processes
informed consent and participant protection		Informed consent processes
informed consent documents	complexity and lenght of those documents	Informed consent processes
Informed consent from experimental subjects beofore enrolling them in clinical trials	0	Informed consent processes
Informed Consent is responsability of the investigator		Informed consent processes
Informed consent management	0	Informed consent processes
informed consent process	0	Informed consent processes
Informed consent processes		Informed consent processes
Informed consent so as to ensure adequate knowledge of the subject and not placed under coercion.		Informed consent processes
informed conset	0	Informed consent processes
informed, voluntary participation	ethical imperative to educate population about research	Informed consent processes
Infrastructure for conducting trials		N/A
Injury by external cause (in women)		N/A
Innovative trial designs		N/A
Innovative trial designs	some trials need complex designs to be able to answer pertinent questions considering ethical issues as well.	N/A
Innovative trial designs, e.g. initial trials of new drugs vs placebo as 'maintenance' after conventional chemotherapy in palliative oncology.	Licensing and funding often necessitates 'something or nothing' trials, but these are hard to offer at 'final relapse', and disliked by patients and research nurses. Other innovative designs such as adaptive methodology may reduce smaple sizes, costs and trial duration.	N/A
Integrated capacity building and sustainability of the capacity built	0	N/A
integrating research into routine clinical care	a larger number of patients might benefit from research activities; a larger number of clinicians might be trained into research methods	Methods to integrate doing research into routine clinical care
intellectual property issues	0	N/A
Intepretation	It should be easy to understand	N/A
Interesting question	Search unpublished questions	Identifying and prioritising relevant research topics
internet methods to securely collect trial data	Because it will help to have more recruiting sites	Methods for electronic data capture
Interpretation	0	N/A
Interpretation		N/A
Interpretation		N/A
Interpretation	reporting	N/A
Interpretation		N/A
Interpretation		N/A
Interpretation		N/A
Interpretation		N/A
Interpretation	its important as to know what can be circumstatnces be like pros and cons	N/A
Interpretation		N/A
Interpretation		N/A
Interpretation		N/A
Interpretation		N/A
Interpretation		N/A
interpretation	it has more areas that need deep understanding for those who have been involved in the trial to know the actual reason why the trial was done.the primary peolpe who be participants to know why the trial was done and what does it mean to them after interpretation	N/A
interpretation		N/A
interpretation		N/A
interpretation		N/A
interpretation		N/A
interpretation		N/A
Interpretation assess risk-benefit		N/A
interpretation of adverse events	0	N/A
interpretation of clinical trail results		N/A
Interpretation of research findings	0	N/A
Interpretation of results	0	N/A
Interpretation of results	Wrong intrpretation of results may result correct or wrong recommensation to whether the prodduct is useful or not.	N/A
Interpretation of the results	0	N/A
Interpretation of trial results	A need to understand the external validity of trial results	N/A
Intervention with community participation	0	Community engagement
Interventions		N/A
investigational plan	overal study design,rationale for patient population	N/A
Investigator paticipates in the trial design	0	N/A
Investigator selection and site selection	0	Assessment of site and investigator
Involvement of adolescents in clinical trials	An important area in HIV prevention sincer adolescents are at risk	Recruiting adolescents in clinical trials
Involvement of pregnant women in clinical trials	A group that is often excluded without justification	Recruiting pregnant women in clinical trials
involvement of women	exclusion leaves gap in knowledge about effects on half the population of the intervention being studied	Recruiting women in clinical trials
Involving students in clinical trials	How to educate about clinical trials	Recruiting adolescents in clinical trials
IRB/study registration times	0	Methods for streamlining trials
Iui versus ivf in low iconomic countries		N/A
ivf versus icsi-natural selection vs manmade choice	0	N/A
Joint modelling	0	N/A
laboratory investigations	clients were investigated on clinical symptoms	N/A
Laboratory Oversight for primary endpoints	0	N/A
Laboratory specimen analysis	0	N/A
Labs (pk, pd and safety )	0	N/A
Large sample size through appropriate sample size determination so as to have range for the trial.		Calculating sample size
liaison with community	0	Community engagement
Link between trial outcome measures and epi/economic models	Trials alone do not provide all the necessary information answer epi/economics questions	Methods for economic analysis
literature search	necessary	Using previous evidence to inform trial design
Local practises	Have a major influence on trial conduct	Impact of cultural context on acceptability of clinical trials and its methods
Logistics	Logistical problems should be looked at in other to promote efficiency and effectiveness.	N/A
Long term sample storage, utilisation and analysis	LMIC need to be enabled to reduce cost of research and build capacity for subanalyses	N/A
Longitudinal cilinical trial on Oncology centers in developing countries	0	N/A
Lost to follow up	0	Methods to minimise attrition
Maintaining high levels of follow up	0	Methods to minimise attrition
Make better guidelines for the design of trials		N/A
Make it easier for young doctors to participate		N/A
Making consent simpler for children and newborns including opt out and emergency consent	Because it remains hard to do research especially on neonates	Trials in emergency settings
Making sure the dangers phase participants are exposed to are brought to their barest minimum	0	N/A
Making trials more participatory and inclusive	0	Patient and public involvement
Making trials simpler - move to pragmatic trials	Many trials are not easy to generalise and are conduced in too few and too specialised settings	Pragmatic (or "effectiveness") trials
MALARIA	Malaria is an endemic disturbing the sub sahara Africa	N/A
Malaria	It is a burden in my country	N/A
Malaria		N/A
Malaria prophylaxis	The number of people dying from malaria has alarming rate, the IPT strategy looks like it has hit a snag, the suggestive effective way is to develop prophylaxis for malaria	N/A
Malaria resistance	0	N/A
MALE CIRCUMCISSION.	I have alot of knowledge an experience on this because i was among the research team.	N/A
Malnutrition still posses a great threat in the 21st century	Food security is like a dream not come true, children still die due to malnutrition, there is need to review how best to help resolve the situation	N/A
Management and maintaining study participants before/during/end the trial dration	rigor of RCT with free living population is challenging	Methods to minimise attrition
Managing protocol violations	Data limited regarding this. A lot on prevention (appropriately) but once a vioaltion happens not much guidance on how to actually handle and its impact on trial results	N/A
Mathematical modelling of study designs	Having homogenous population with known background health information , if we could propose mathematical modelling of design, then trial could be conducted with much lesser sample wnd very less exposed risk.	N/A
Measurement accuracy	Ensure validity and comparison	Methods for data management
Metanalysis	integrated approach	N/A
Method		N/A
Method of administration that will stimulate less risky potential to the subjects.		N/A
method of present informed consent		Informed consent processes
Method of Randomization	it is important to avoid bias	Randomisation methods
Method of trials conduct	Trials conduct is usually limited, considering the diversity of human race or other study subjects. When study products are approved, they are expected to be used universally and not only within the geographical locations in which they were trialed.	Representativeness in relation to inclusion/exclusion
Method of trials design	Because trials design should not only be based on scientific theory, but should also consider social context	N/A
Method sharing (SOPs etc)	It's important to pool data	N/A
method to boost recruitment	0	Methods to boost recruitment
method to boost recruitment		Methods to boost recruitment
method to boost recruitment		Methods to boost recruitment
method to retain participants	0	Methods to minimise attrition
Methode to boost recruitment	very important because it impossible to do study if you don't have participant so the methodology will in accordance with what we need to do.	Methods to boost recruitment
Methode to minimize bais	no bais is good for the results	N/A
Methodes for trial monitoring	0	Methods for trial monitoring
Methodes to minimise bias		N/A
Methodology	Recruitments is an issue in most of the trials	Methods to boost recruitment
Methodology	Recruitments is an issue in most of the trials	Methods to boost recruitment
methodology		N/A
methodology		N/A
methodology		N/A
Methodology and developing protocol	It is important for analysis and conducting study	N/A
methodology of implementation	0	N/A
methodology of phase IV clinical trials in LMIC	0	Pragmatic (or "effectiveness") trials
Methodology to imrove recruitment and retention of participants in the trial		Methods to boost recruitment
Methods		N/A
methods	because is how we will do the reasech	N/A
methods	because is how we will do the reasech	N/A
methods	to standardise ways of ensuring universally acceptable practices	N/A
Methods and design		N/A
methods for biases control		N/A
methods for blinding		Methods of blinding
Methods for boost recruitment	0	Methods to boost recruitment
methods for choosing rational outcome measures		Choosing appropriate outcomes to measure
methods for improving patient's compliance		Adjusting for non-adherence to treatment protocol
Methods for interpretation of results		N/A
methods for keep high compliance	poor compliance will decrease the power of a clinical trial	Adjusting for non-adherence to treatment protocol
Methods for laboratory assessment in low incoming countries	0	N/A
Methods for measuring subjective trial end points that are not captured through e.g. PROMS, such as medical histories, adverse events and use of prior/concomitant medicines.	I wondered whether the disparate methods to elicit these reports from participants I observed across and within trials had an impact on those trial data captured. I have gone some way in this research which showed that communication methods and the trial context are influential, but there is a need for more.	Choosing appropriate outcomes to measure
Methods for SAE assessment and reporting	0	Strategies for adverse event reporting
Methods for simplest trials	It is necessary to try to have good results with simpler trials; In low-income countries it is sometimes difficult to follow the subjects completely, they are many visits, a lot of time and many blood samples	N/A
Methods for site assessment in low incoming countries	0	Assessment of site and investigator
Methods for training site support staff to conduct clinical trials.	I observed that training for support staff is often limited to GCP and a bit of trial-related didactic training, and that there may be a better, cost-effective way (e.g. blended-learning) to increase competencies and support then in their clinical trial careers.	Training of research staff
methods for translating clinical problems to clinical trials		Choosing appropriate outcomes to measure
Methods for trial monitoring	0	Methods for trial monitoring
Methods of affiliations	This will support your trials sustainability	N/A
Methods of calculating the sample sze	0	Calculating sample size
Methods of clinical trial design	It will help to make clinical trial clearer to understand	N/A
Methods of data management	0	Methods for data management
Methods of disseminating findings from clinical trials	To ensure the results of the trials count	Methods of dissemination of findings
Methods of minimising bias in trials where blinding is not possible	there are some cases when it gets very difficult to use blinding method	Methods to minimise bias in trials when blinding is not possible
Methods of providing information about the study	The methods of selecting the nature, type, and time of providing information to both trials participants and subjects is crucial.	Methods of dissemination of findings
Methods of rehabilitations	This will help in analysing your results	N/A
methods of trial monitoring(RBM)	0	Methods for trial monitoring
methods on retaining subjects	0	Methods to minimise attrition
methods or designs to avoid contamination when trials is run in one single ward	we run trials in specific wards and avoiding contamination of intervention/control group is tricky, specially, if you want to have similar groups at baseline	N/A
Methods that enhance recruitment but reduce bias	many of research participnats are from the low income strata. How can we get different demographics to be involved	Methods to boost recruitment
Methods that will speed up enrollment	This is very important because always clinical trials are timely so without having this method of speeding up the procedures of enrolling it wont work out.	Methods for streamlining trials
Methods to assess the completeness, quality and accuracy of study data	It is crucial to ensire consistent quality of database, for the purpose of data sharing	Methods for data management
Methods to avoid information bias	0	N/A
Methods to avoid lost-to-follow-up	Many patients felt harass when we call for a follow-up visit	Methods to minimise attrition
Methods to avoid participants abandoning the trial		Methods to minimise attrition
Methods to boost organization	With few resources is very important to keep organization to avoid mistakes	N/A
Methods to boost recruitment	Hitting recruitment target ensures that the sample size for the study is achieved and hence boosts data analysis	Methods to boost recruitment
Methods to boost recruitment	People are sceptical about the motives of clinical trials	Methods to boost recruitment
Methods to boost recruitment	Recruitment of individuals in LMICs is faced with resistance	Methods to boost recruitment
Methods to boost recruitment	Getting the right and cooperative patients for any trial is as good as the result that will be gotten	Methods to boost recruitment
Methods to boost recruitment		Methods to boost recruitment
Methods to boost recruitment		Methods to boost recruitment
Methods to boost recruitment	This methods will help to indentify number of participants and period of the trial.	Methods to boost recruitment
Methods to boost recruitment		Methods to boost recruitment
Methods to boost recruitment		Methods to boost recruitment
Methods to boost recruitment		Methods to boost recruitment
Methods to boost recruitment		Methods to boost recruitment
Methods to boost recruitment	Good to respect trial timelines	Methods to boost recruitment
Methods to boost recruitment	It is important to attain the desired sample size	Methods to boost recruitment
methods to boost recruitment	participant recruitment in clinical trials is a challenge in most cases, hence it is important to have knowledge on various ways to boost recruitment.	Methods to boost recruitment
methods to boost recruitment	it is very difficult.	Methods to boost recruitment
methods to boost recruitment		Methods to boost recruitment
methods to boost recruitment	This is an important basis for clinical trials	Methods to boost recruitment
methods to boost recruitment		Methods to boost recruitment
methods to boost recruitment	many subjects are afraid of clinical trials	Methods to boost recruitment
methods to boost recruitment		Methods to boost recruitment
methods to boost recruitment	In our reality recruitment timelines do not meet the initial projections	Methods to boost recruitment
methods to boost recruitment	In my experience, patients do not always understand the relevance of research and therefore, do not consent	Methods to boost recruitment
methods to boost recruitment		Methods to boost recruitment
methods to boost recruitment	i du not understand the question	Methods to boost recruitment
methods to boost recruitment	because without recruitment , we will not have subject for the trial	Methods to boost recruitment
methods to boost recruitment		Methods to boost recruitment
methods to boost recruitment		Methods to boost recruitment
methods to boost recruitment	Recruitment can be difficult	Methods to boost recruitment
methods to boost recruitment		Methods to boost recruitment
methods to boost recruitment	participant recruitment in clinical trials is a challenge in most cases, hence it is important to have knowledge on various ways to boost recruitment.	Methods to boost recruitment
methods to boost recruitment		Methods to boost recruitment
methods to boost recruitment	You cannot finish a trial without insufficient number of patients.	Methods to boost recruitment
methods to boost recruitment		Methods to boost recruitment
methods to boost recruitment	Facilitates studies and weighs on results	Methods to boost recruitment
methods to boost recruitment		Methods to boost recruitment
methods to boost recruitment	methods to boost recruitment	Methods to boost recruitment
Methods to boost recruitment in trials.	0	Methods to boost recruitment
Methods to boost recruitment.	Recruitment faces a lot of ethical challenges.	Methods to boost recruitment
Methods to boost recuitment		Methods to boost recruitment
Methods to boost the recruitment	Operationalization of the clinical trial	Methods to boost recruitment
Methods to boost trial participants retention	There is an unacceptal degree of lost in follow up	Methods to minimise attrition
methods to boost trial support		N/A
methods to boosts recruitment	vaccines management needs trained and expewrience clinicians to monotor the coldchain	Methods to boost recruitment
methods to conduct a clinical trial		N/A
Methods to consent in emergency settings.	0	Consent in emergency settings
Methods to create awarenace	This method helps the community to understand the subjects.	Community engagement
Methods to decrease missing data.	When participants miss their visits brings difficulty in drawing conclusion.	Methods to minimise attrition
methods to enhance trial medication adherence	In user dependent trial medication even if retention is high while the adherence is low this adversley affects trial findings and results in futility. There is need to come up with strategies to assess adherence; identify and adress barriers to adherence during clinical trial.	Adjusting for non-adherence to treatment protocol
Methods to ensure accurate/robust data collection	0	Methods for data management
Methods to ensure quality of data collected	Internal monitoring is essential to ensure the quality of data	Methods for data management
Methods to get actual data from safety follow up		Strategies for adverse event reporting
methods to increase the rate of follow-up	For trials requiring long-term follow-up, this issue is challanging	Methods to minimise attrition
Methods to minimise attrition		Methods to minimise attrition
Methods to minimise attrition.	Attrition leads to biased estimates	Methods to minimise attrition
Methods to minimise bias in trials when blinding is not possible		Methods to minimise bias in trials when blinding is not possible
Methods to minimise the attrition		Methods to minimise attrition
methods to minimize attrition		Methods to minimise attrition
Methods to minimize attrition.	Attrition leads to biased estimates	Methods to minimise attrition
Methods to minimize bias in trials.		Methods to minimise attrition
methods to monitor and improve adherence to study protocol		Adjusting for non-adherence to treatment protocol
Methods to monitor trial conduction	0	Methods for trial monitoring
Methods to promote adherence	An important area in HIV prevention trials	Adjusting for non-adherence to treatment protocol
methods to promote recruitment	0	Methods to boost recruitment
Methods to recruitment	With social media taking centre stage more robust and trustworthy methods such as use if TV, radio need to be ephasised	Methods to boost recruitment
Methods to reduce trials timelines between two phase	Often, we take much times to pass phase 1 to 2 while we need to go quicky regarding the threat of disease	Methods for streamlining trials
methods to resolve missing data in blind review of data sets		Methods for dealing with missing data
methods to retain participants		Methods to minimise attrition
Methods to sample size calculation	Because it is challenging in a small target population	Designs for rare diseases and smaller populations
Methods to sustain recruitment	Non response rate and retaining participant in study has been one key issue in meeting sample size	Methods to boost recruitment
Methods to test feasibity of recruitment process	0	Methods to boost recruitment
methords to boost recruitment		Methods to boost recruitment
Metoda to boost recruitment	I am interesting of this	Methods to boost recruitment
minimizing cost of assisted reproductive treatment in low resources countries	0	N/A
missing data	methods to handle/multiple imputation	Methods for dealing with missing data
Modelling of Pelvic Inflammatory Disease among female student, University of Abuja.	0	N/A
Modelling the contribution of malaria, HIV infection in pregnant women	0	N/A
Monitoring		Methods for trial monitoring
Monitoring	It important for making sure that clinical trial are conducted properly and according to protocols	Methods for trial monitoring
monitoring	0	Methods for trial monitoring
Monitoring activities sufficient to reassure data validity	0	Methods for trial monitoring
Monitoring and evaluation	Informs reporting of results for KPIs	Methods for trial monitoring
Monitoring and evaluation of clinical trials	To ensure the data provided in databases is exactly what is on the ground (site)	Methods for data management
Monitoring of clinical trials	Systems for monitoring clinical trials are not well developed in LMICs	Methods for trial monitoring
Mother Mortality	0	N/A
motivations for sites to boost recruitment	0	Methods to boost recruitment
Multiple arm studies	combinatorial studies can save on study designs	Multi-arm, multi-stage trials
Multivariate and regression	comprehensive analysis	N/A
negative results	0	Trial reporting issues
negative results reporting	0	Trial reporting issues
neglected diseases	0	N/A
NEGLECTED INFECTIOUS DISEASES	Because my country has less qualified personal who may be helpful especially if research evidence is provided for them when they are trained in the prevention of such.	N/A
Neonatal death		N/A
Nesting observational studies on trials and publication rights	they are many research questions that could be answered to the very strict inclusion and exclusion criteria from trials population	N/A
new designs for clinical trials	0	N/A
N-of-1 methods	0	N-of-1 trials
NON COMMUNICABLE DISEASE INTERVENTIONS	0	N/A
Non violation of protocole		Adjusting for non-adherence to treatment protocol
non-adherence to medication and/or study procedures	how to analyse it?	Adjusting for non-adherence to treatment protocol
Not sure what you are expecting here		N/A
Novelty	Policy implications	N/A
number of patients not calculate by a biostatistician	inadequate no. of patients to answer the primary objective	Calculating sample size
number of primary objective vs secondary objectives	too many trials have multiple primary objectives	Choosing appropriate outcomes to measure
Observational investigation	We need to learn with observation	N/A
Obtaining a reasonable sample size which could represent a population	0	Calculating sample size
Operational research	Relatively cheaper, aas in most LIC no dedicated research time , can be conducted in the course of clinical work	N/A
Other innovative trial design	0	N/A
Outcome assessment	0	Choosing appropriate outcomes to measure
Outcome measure methods	0	Choosing appropriate outcomes to measure
Outcomes		Choosing appropriate outcomes to measure
Over researching populations	With the focus on developing nations - research is being conducted without formal registration with governments and/or understanding what other studies and interventions (both health and economic and development) are conducted in the same locale. Important to create a registration tool (or network) not only for clinical trials but to also inform health practitioners about other research that might	Identifying and prioritising relevant research topics
over-interpreting of findings	0	N/A
Oversight for clinical trials in LMICs	Limited capacity in LMICs	Methods for trial monitoring
participant recruitment for clinical trials	0	Methods to boost recruitment
Participant retention challenges over long medium to long term	I have experienced challenges with participants withdrawing consent for trial participation	Methods to minimise attrition
Participants Recruitment	It is key of the research	Methods to boost recruitment
Participants recruitment	Clear guidelines should be adhered and followed so as to obtain good and consistent results. There should be no bias.	Methods to boost recruitment
Participants recruitment and retention.	Methods of recruitment, advertisement and costs of it should be covered generously from the sponsors. Retention can always be very challenging, any help is always highly appreciated.	Methods to boost recruitment
Participant's safety	very clitical in clinical trial	Strategies for adverse event reporting
Participants Selection	It is important for the validity of the results	Representativeness in relation to inclusion/exclusion
participants/client recruitment	those who meet criteria	Methods to boost recruitment
participation of population in design of the trial	improves quality of research and increases recruitment	Methods to boost recruitment
Patient centered trials	Always the trials are driven in patients and not with patients	Patient and public involvement
Patient compliance		Adjusting for non-adherence to treatment protocol
patient outcome report	0	Patient reported outcomes
patient recriutment	to strictly define all of the inclusion and exclusion criteria, including therapy, past diseases etc	Methods to boost recruitment
Patient understanding of and participation in trail	Practices and procedures need to be in place to educate patients re the study and allow the participant to voice concerns	Informed consent processes
Patient/subject centric recruitment and retention		Methods to boost recruitment
Patient-centered outcome end points	QOL eg in cancer patients is an area that lacks attention in LMICs	Choosing appropriate outcomes to measure
patients' involvement in biomedical research	in setting priorities, understand and communicate, and control of biomedical research; NOT ONLY in participation	Patient and public involvement
Patients safety aspects	0	Strategies for adverse event reporting
Patients selection	0	Representativeness in relation to inclusion/exclusion
patients/data excluded from the analyses	often done in a retrocpective way	N/A
Pediatric Mortality	0	N/A
Pediatric studies design	0	Paediatric trial designs
pediatric trials	Despite the establishment of the pediatric plans, no substantial increase has been sent and these trials are usually of difficult recruitment	Paediatric trial designs
PEER research http://www.options.co.uk/peer		N/A
Personnel records	These determine validity of trial findings	N/A
Pharmaceutical and drug issues for maternal and newborn health in developing countries	0	N/A
Phase II trials methodology	generally there are the same and the measurement also so it's quiet important like that.	Design of phase II trials
Placebo using	0	Use of placebo and its necessity
plaebo controlled	0	N/A
Planning & conduct to ensure good compliance in RCT	have conducted several intervention studies	Adjusting for non-adherence to treatment protocol
Plans for assessing, managing and reporting adverse events	0	Strategies for adverse event reporting
platform trials		Multi-arm, multi-stage trials
Population	It is important to know the study population e.g children or adults	Representativeness in relation to inclusion/exclusion
population PK	0	N/A
population under investigation		Representativeness in relation to inclusion/exclusion
Populaton PK in children and neonates	0	N/A
post clinical trials responsibilities	0	N/A
post trial benefit sharing	not provided by most sponsor	N/A
potential for community participation	0	Community engagement
Power analysis and sample size calculations	Often studies are underpowered, thus waste of resources	Calculating sample size
Power calculation	0	Calculating sample size
Power calculations when you do not have any estimate of effect	we calculated sample size based on the best evidence we found, but the trial was still underpowered	Calculating sample size
power, sample size, literature and field reality	0	Calculating sample size
Practicallity of the safety or Data safety monitoring committee	how to set up and implement a data safety monitoring committee	Methods for trial monitoring
Practice		N/A
Practice		N/A
Practices	Good clinical practices for example should be enhanced	N/A
Practices	This topic affects the quality of the test, the accuracy of the data and the reliability of the trail.	N/A
Practices	Need use correct practices	N/A
Practices	Good clinical practices for example should be enhanced	N/A
Practices and procedures	0	N/A
practices and procedures that are used for the design	very important also, GCp and GLP are key component of a clinical trial	N/A
Practices to facilitate consent process and comprehension	Consent process is a pillar for compliance of subject in study follow up	Informed consent processes
Pragmatic Studies	0	Pragmatic (or "effectiveness") trials
Pragmatic trial	The conduct and result of pragmatic trials may not be as "controlled" as conventional trial but can be more applicable in LMIC setting.	Pragmatic (or "effectiveness") trials
Pragmatic trials	0	Pragmatic (or "effectiveness") trials
pragmatic trials		Pragmatic (or "effectiveness") trials
Pragmatic trials.	0	Pragmatic (or "effectiveness") trials
Pragmatic, RCTs in humanitrian crisis eg Ebola	Because single arm studies in insufficent	Pragmatic (or "effectiveness") trials
Pre test	To teach the entire group previously, so they can do exactly what the protocol says	N/A
Preparation for trial	Good preparation in terms of training of staff, logistics and materials etc.	Training of research staff
Preparation/procedures for the the conduct of clinical trials	the level of preparation and type of procedures to be considered in the conduct of clinical trials is important.	N/A
preserving ethics		N/A
Preserving the integrity of the intervention being studied	0	N/A
Primary care trials	0	Trials run outside of hospitals
Problem of poor water supply and prevalence of enteric fever in wukari Taraba state	0	N/A
Procedure	0	N/A
Procedure used for design studies	Objective answer	N/A
Procedures	Blood drawas leads to more consent withdrawal	N/A
Procedures	Blood drawas leads to more consent withdrawal	N/A
Procedures		N/A
procedures	To ensure that research conforms to required standards	N/A
procedures		N/A
procedures		N/A
process evaluation	0	N/A
Process evaluation methods eg Qualitative work to understand eg how and why implementation varies, mechanisms involved	INterventions don't have standard effects, need to understand variations and what leads to outcomes	N/A
Professional experience of CTU Director	This is an important priority for trials methodology research, in terms of years of experience in clinical trial conduction.	Training of research staff
Professional statistics		N/A
progeny from gamete donation-future risk of expression of rare eecessive inherited disorders globally	0	N/A
Project managment	One should master project management skills before much involvement in clinical reaserch	N/A
Proof of concept trials (POC) involving more than one competitors to establish the safety/effcacy of various medicinal products in competition	to increase the chance of identifying the best medicinal product especially in case of re-emerging diseases like ebola	Assessment of proof of concept trials
Proper blinding method		Methods of blinding
Proper conduct of clinical trials	Even if astudy has been designed well, when its poorly conducted the results will be disastrous. so methods of to how to conduct an effective study need to be given priority.	N/A
Proper methods of data analysis	0	N/A
Proper methods of dissemination of reports	0	Methods of dissemination of findings
prospective	the data are complete	N/A
Prospective cohort	0	N/A
Prospective Cohort study	Measure the incidence rate of a particular disease, as we know Cohort studies clearly indicate the temporal sequence between exposure and outcome of a particular disease/condition	N/A
Prospective cohort study design	To estimate the incidence and study treatment outcomes since there was a follow up.	N/A
protection of the vulnerable in clinical trials	0	N/A
proteomics at embryo-endometrium interface	0	N/A
protocol creation	0	N/A
protocol design		N/A
protocol guidance	0	N/A
Public awareness		Community engagement
Public health		N/A
Publication	0	Methods of dissemination of findings
Publication	othter need to learn from these publications	Methods of dissemination of findings
Publication		Methods of dissemination of findings
Publication workshop	0	Methods of dissemination of findings
Publications	Research is about sharing of ideas and new findings. without publications clinical trial outcome remain dormant and is good as no idea was found.	Trial reporting issues
publications		Trial reporting issues
publishing models	the debate over open vs closed access has not been settled, yet	N/A
Qualitative data collection along with quantitative.	Individual feedback from participants is rarely recorded as protocols do not request it.	N/A
Qualitative trial conducts	How quality trial is conduct make evidence of how quality data produced	Methods for data management
Quality assurance	0	Methods for data management
Quality assurance un obstetric ultrasound	0	N/A
quality control and assurance	0	Methods for data management
Questionnaire		N/A
Questionnaire design - eg for awareness about lung health, or use of cooking stoves	Often not published in health journals so harder to access previous examples of validated tools	Questionnaire design
questions of equipoise	0	Questions of equipoise
Radomised trials to promoting community participation in mental health	Find ways in reducing stigma in mental health	Community engagement
Random allocation	0	Randomisation methods
Random allocation of study agent		Randomisation methods
Random sequence generation		Randomisation methods
RANDOMISATION		Randomisation methods
Randomisation		Randomisation methods
Randomisation		Randomisation methods
Randomisation		Randomisation methods
Randomisation		Randomisation methods
randomisation of subjects	investigators are not familiar with randomisation procedures	Randomisation methods
Randomised blinded clinical trials	more powerful to provide proof of efficacy or arm	Randomisation methods
Randomization	unbiais	Randomisation methods
Randomization	To balance the arms	Randomisation methods
randomization	0	Randomisation methods
randomization		Randomisation methods
randomization and blinding	0	Randomisation methods
Randomization Procedure		Randomisation methods
Randomization procedure and allocation of concealment used in study	avoidance of intervention bias	Randomisation methods
Randomization techniques of study participants		Randomisation methods
Randomization unbiased		Randomisation methods
Randomization: sequence allocation preparation	Rarely described in textbooks	Randomisation methods
randomized		Randomisation methods
Randomized controlled trial		Randomisation methods
randomized controlled trial		Randomisation methods
rare disease trials/small trials	0	Designs for rare diseases and smaller populations
RCT	this Good randomization will _x001C_wash out_x001D_ any population bias	Randomisation methods
RCT design	Because it is the gold standard for conducting any rigorous trials and clearly provide evidence of fair recruitment of participants for true analysis and results.	N/A
RCTs in low income settings	0	N/A
RECRUITMENT	0	Methods to boost recruitment
Recruitment		Methods to boost recruitment
Recruitment		Methods to boost recruitment
Recruitment		Methods to boost recruitment
Recruitment	With increasing research going on it is getting more and more difficult to get participants and get those that do it for the right reason (not just the remuneration).	Methods to boost recruitment
Recruitment	a lot of participants are not well informed about trials therefore they shy away from being involved.	Methods to boost recruitment
Recruitment		Methods to boost recruitment
Recruitment		Methods to boost recruitment
Recruitment		Methods to boost recruitment
Recruitment	Trustworthy	Methods to boost recruitment
Recruitment	This is another common cause for delays in clinical trials. Realistic recruitment targets and methods too boost them is an important issue	Methods to boost recruitment
Recruitment		Methods to boost recruitment
Recruitment		Methods to boost recruitment
recruitment	some of the rules of our ethics board does not balance science and ethics in research and culturally it is hard for participants acceptance of being ransomed to a possibly inferior drug	Methods to boost recruitment
recruitment		Methods to boost recruitment
recruitment		Methods to boost recruitment
recruitment		Methods to boost recruitment
recruitment		Methods to boost recruitment
recruitment	the recruitment should be emphasised on eligibility of participants	Methods to boost recruitment
recruitment and community involvement		Methods to boost recruitment
recruitment and retention	0	Methods to boost recruitment
Recruitment and retention designs	In studies in infants and children, with long follow up it is important for study team to keep in touch regularly with participant which might be expensive.	Methods to boost recruitment
Recruitment and retention strategies	0	Methods to boost recruitment
Recruitment done by the investigator	0	Methods to boost recruitment
Recruitment harmonisation with in players in LMIC and involvement of rural LMIC	0	Methods to boost recruitment
Recruitment method	Is a critical point	Methods to boost recruitment
recruitment methods	0	Methods to boost recruitment
recruitment of participants		Methods to boost recruitment
Recruitment of patients with Post-Partum Haemorrhage (PPH) to be treated by tranexamic acid	To test if Tranexamic acid will help to stop unnecessary death and hysterectomy due to PPH -> designed at LSHTM	Methods to boost recruitment
Recruitment of potential participants	0	Methods to boost recruitment
Recruitment of study participants	0	Methods to boost recruitment
recruitment of study participants	working in a clinical field, it is essential to follow the principles of ethical conduct in selection of the participants	Methods to boost recruitment
recruitment planning	0	Methods to boost recruitment
recruitment strategies	0	Methods to boost recruitment
Recuitment to clinical trials	0	Methods to boost recruitment
reducing performance bias	0	N/A
Reducing processes that stifle innovation	The processes from application to reporting have become increasingly cumbersome over the 23 years I have been working in clinical trials and this stifles innovation as everyone involved in review is scared of anything new!	N/A
Registration of eligible patients and patients who refuse to participate in the trial	Does this yield reliable data? Especially in multicenter studies	N/A
regulation of conduct of clinical trials	Poor regulation and oversight by supervisory bodies in developing countries	Methods for trial monitoring
regulation of research activities	role of ethical committees and funding bodies in overseeing research activities and communication of results	Methods for trial monitoring
regulatory capacity	0	N/A
relevance of a trial to needs of population	ethical imperative	Identifying and prioritising relevant research topics
relevance of endpoints to reducing morbidity & mortality	basic research can look at surrogate endpoints but clinical trials should look for actual changes in health/survival	Choosing appropriate outcomes to measure
Relevance to the objectives of the organization funding the study	0	N/A
Report	Care must be taken that the report is in line with the original plan of the study	Trial reporting issues
Report of critical events		Strategies for adverse event reporting
Report writting	It is important for exchange of knowledge	Trial reporting issues
Reporting	dissemination of the findings where and when to which stakeholders	Methods of dissemination of findings
Reporting		Methods of dissemination of findings
Reporting	The packaging of the results at the reporting stage is crucial	Methods of dissemination of findings
Reporting		Methods of dissemination of findings
Reporting	lack of experience and practice	Methods of dissemination of findings
Reporting	dissemination of the findings where and when to which stakeholders	Methods of dissemination of findings
Reporting	To improve the evidenced-based medicine	Methods of dissemination of findings
Reporting		Methods of dissemination of findings
Reporting		Methods of dissemination of findings
Reporting		Methods of dissemination of findings
Reporting		Methods of dissemination of findings
Reporting		Methods of dissemination of findings
Reporting		Methods of dissemination of findings
Reporting		Methods of dissemination of findings
reporting	0	Trial reporting issues
reporting	much thought needs to be put while reporting the results to ensure that the reporting reflects the research findings	Trial reporting issues
reporting	experience	Trial reporting issues
reporting		Trial reporting issues
reporting		Trial reporting issues
reporting		Trial reporting issues
reporting		Trial reporting issues
Reporting adverse events	0	Strategies for adverse event reporting
reporting also of negativ results	0	Trial reporting issues
reporting and dissemination	0	Methods of dissemination of findings
Reporting and sharing benefits	Apart from publication, participants should receive the results in a communicable format.	Methods of dissemination of findings
Reporting methodology	0	Trial reporting issues
Reporting methods	0	Trial reporting issues
reporting of ADR and SADRs	the data collection and reporting usually rests with CRMs or government institutions and is not very well executed	Strategies for adverse event reporting
Reporting of bias	Despite differences in retention and follow-up, researchers often attribute experimental results to interventions given balanced groups at baseline	Trial reporting issues
reporting of clinical	present the full of Meaningful interpretation of the study	Trial reporting issues
Reporting of clinical trials	0	Trial reporting issues
Reporting of clinical trials		Trial reporting issues
Reporting of clinical trials		Trial reporting issues
Reporting of clinical trials		Trial reporting issues
Reporting of clinical trials	Right information formation should be availed no information should be hidden the adverse effects should be reported	Trial reporting issues
reporting of clinical trials	0	Trial reporting issues
reporting of clinical trials	Low adherence to the CONSORT	Trial reporting issues
reporting of clinical trials	outcome of the study - both expected and unexpected will guide the scientific community	Trial reporting issues
reporting of clinical trials		Trial reporting issues
reporting of clinical trials	Data must be report in a good way (source documents), very important	Trial reporting issues
reporting of clinical trials	it is important.	Trial reporting issues
Reporting of clinical trials findings	0	Trial reporting issues
Reporting of clinical trials in LMICs	most of the stakeholders involved in reporting of CTs are not based in LMICs. How are these involved in reporting?	Trial reporting issues
Reporting of complex interventions	Too many buzz words. Implementation science, adaptative designs, hybrid designs. We need to KISS.	Complex interventions
reporting of data	good report allows good analysis	Trial reporting issues
Reporting of negative results	0	Trial reporting issues
Reporting of trial findings	Due to limited support in data management and analysis, trials are either not reported or are delayed.	Trial reporting issues
Reporting of trials	0	Trial reporting issues
Reporting of trials		Trial reporting issues
reporting of trials	0	Trial reporting issues
reporting or clinical trials	This needs to be transparent and correspond to what was put out in the trial protocol.	Trial reporting issues
Reporting secondary analysis	There are many secondary data collected that we could use	Trial reporting issues
Reporting styles	0	Trial reporting issues
reporting the outcome of clinical trial	0	Trial reporting issues
Reporting was by an online form on the LSHTM website	Choosen by the LSHTM	N/A
Representative and reproducible patient population	Many trials are unclear how participants were included in the screened population or do not match what is seen in practice	Representativeness in relation to inclusion/exclusion
Representativeness of the trial population	0	Representativeness in relation to inclusion/exclusion
Reproductive health	0	N/A
Research design	the design need to adhere to the question	N/A
Research ethics	0	N/A
research ethics	0	N/A
Research ethics and research coordination	One needs to master the fundamental ethical principals underpinning clinical research.	N/A
Research into methods to boost the recruitment in trials		Methods to boost recruitment
Research Literacy of communities where research is conducted, especially in low socioeconomic areas.	0	Literacy
research methods to deal with attrition	0	Methods to minimise attrition
Research Question	the question will guide and design the way of the research could be, if research questions are not clear the project will be mess afterwwards	Choosing appropriate outcomes to measure
Research regulatory requirements in LMIC's	The cornerstone to fair and reliable research, with participants protected as a central theme	N/A
Research staff	Because we lack of well-trained investigators as well as	Training of research staff
Researching issues that are really relevant	0	Identifying and prioritising relevant research topics
Reserch concepts	Clinical trials depends on good conceptualization of ideas. Once you have a good idea which you are able to put it into a good concept, other areas would follow suits	N/A
Resources	To fund appropriate staffing, equipments, manage results among others.	N/A
Respect good clinical practice	0	N/A
Results analysis	It is a core reason of the research	N/A
Results dissemination plans and execution thereof.	0	Methods of dissemination of findings
results interpretation	0	N/A
Results of the trial	most people they dont get the results of the trials and this affect next trials because people feel like are just being used in trials.	Methods of dissemination of findings
Retention	it shows the acceptability of a study	Methods to minimise attrition
Retention		Methods to minimise attrition
Retention	Loss to follow-up can be very high due to transient populations	Methods to minimise attrition
Retention of participants	0	Methods to minimise attrition
Retention of participants	To ensure valid results (as loss of participants could lead to bias) and cost effective completion of the study	Methods to minimise attrition
retrospective	th bad one	N/A
Retrospective study design	We proposed to use samples that had already been collected in the parent study	N/A
Ring design	Clustering is also a means conducting clinical trials within the hotpots of where the targeted participants are located. It is quite easy approach and cost effective.	Cluster trial
Risk assessment algorithm	To asses the background risk and risk due to intervention some mathematical tool like O'brian curve should be designed.	Risk assessments
Risk based monitoring in LMIC	0	Risk assessments
Risk factors for diseases in community		N/A
Risk monitoring	0	Risk assessments
Robust randomisation methods	0	Randomisation methods
role of health economics in trial design	0	Methods for economic analysis
Role of researchers when conducting many trials in a small area	0	Methods to boost recruitment
Rondomization and blinding	Minimise bias and confounding factors	Randomisation methods
Rules and regulations vs workable conduct of trials	So much time now is spent on following the rules and regulations and rules are so strict that actually conducting a trial has become quite difficult.	N/A
Runing the study	to collect data of best quality	N/A
Safety		Strategies for adverse event reporting
safety and immunogenicity	0	Strategies for adverse event reporting
Safety follow up	0	Strategies for adverse event reporting
Safety monitoring	0	Strategies for adverse event reporting
Safety monitoring among health professionals for infectious disease in developing countries	0	Strategies for adverse event reporting
Sample selection	0	Representativeness in relation to inclusion/exclusion
Sample size		Calculating sample size
Sample size	Essential component of a trial in order to establish valid conclusion	Calculating sample size
Sample size	Importance of sample size to have a sufficiently powered study to predict effect	Calculating sample size
Sample size	Validity	Calculating sample size
Sample size		Calculating sample size
Sample size		Calculating sample size
Sample size	A reasonable sample size is key in any trial to get very good results	Calculating sample size
Sample size		Calculating sample size
Sample size		Calculating sample size
Sample size	Sample size	Calculating sample size
Sample size		Calculating sample size
Sample size		Calculating sample size
sample size	this has a greater role on the results.the bigger the sample affects results and the smaller the sample affects too.standard measures on calculation should be done in all countries not only big samples in low income countries.	Calculating sample size
sample size		Calculating sample size
sample size		Calculating sample size
sample size	this has a greater role on the results.the bigger the sample affects results and the smaller the sample affects too.standard measures on calculation should be done in all countries not only big samples in low income countries.	Calculating sample size
Sample size and power	To ensure study will be informative	Calculating sample size
sample size and sampling procedure	clinical trial should be representative	Calculating sample size
Sample size assumptions and calculations		Calculating sample size
Sample Size Calculation	Because, I am mostly involved in providing support to the Principle Investigators on this area	Calculating sample size
Sample Size calculation	Informs representativeness of the study	Calculating sample size
Sample size calculation		Calculating sample size
Sample size calculation		Calculating sample size
Sample size calculation		Calculating sample size
Sample size calculation		Calculating sample size
Sample size calculation		Calculating sample size
Sample size calculation	Its very vital to get the suitable sample size for the chosen study design as this enhances generalisability of the trial results.	Calculating sample size
Sample size calculation	To get apparopriate sample size for validiy	Calculating sample size
Sample size calculation	It is critical to make sure that the study is powerful	Calculating sample size
Sample size calculation	Will give the trial enough power and cost-effective	Calculating sample size
Sample size calculation	Fundamental of clinical trial	Calculating sample size
Sample size calculation		Calculating sample size
Sample size calculation		Calculating sample size
Sample size calculation	It is important to magnify the power of the study	Calculating sample size
Sample size calculation		Calculating sample size
Sample size calculation	This will support your hypothesis	Calculating sample size
Sample size calculation		Calculating sample size
sample size calculation	gives power to the trial	Calculating sample size
sample size calculation		Calculating sample size
sample size calculation	to enable valid results, able to be further extrapolated	Calculating sample size
sample size calculation	gives power to the trial	Calculating sample size
sample size calculation	Every trial need appropriate number of subjects to evaluate its potency	Calculating sample size
sample size calculation		Calculating sample size
sample size calculation		Calculating sample size
sample size calculation	a difficulty most of the time	Calculating sample size
sample size calculation		Calculating sample size
sample size calculation		Calculating sample size
sample size calculation		Calculating sample size
sample size calculation	power of the study results	Calculating sample size
sample size calculation		Calculating sample size
sample size calculation		Calculating sample size
Sample size calculation in cluster randomize tiral	many researchers don't know how to estimate it	Calculating sample size
Sample Size calculations	Given the lack of knowledge of local relevance how to you estimate effect size for a given population	Calculating sample size
Sample Size calculations		Calculating sample size
Sample size calculations		Calculating sample size
Sample size calculations	Investigators should properly calculate sample sizes before and adequately describe the details in their published report.	Calculating sample size
Sample size calculations		Calculating sample size
Sample size calculations	defines feasibility with limited GMP material	Calculating sample size
Sample size calculations	Enable studies to be powered to answer questios	Calculating sample size
Sample size calculations		Calculating sample size
Sample size calculations		Calculating sample size
Sample size calculations	Help avoid bias	Calculating sample size
Sample size calculations	No adequate support in calculating sample size with respec to the study design and research questions	Calculating sample size
Sample size calculations		Calculating sample size
Sample size calculations		Calculating sample size
Sample size calculations		Calculating sample size
Sample size calculations		Calculating sample size
Sample size calculations		Calculating sample size
Sample size calculations		Calculating sample size
Sample size calculations	To find the strict minimum of patients needed to perform an appropriate, the recruitment is difficult in the absence of sponsorship	Calculating sample size
Sample size calculations		Calculating sample size
Sample size calculations		Calculating sample size
Sample size calculations	The trial should be appropriately powered	Calculating sample size
Sample size calculations		Calculating sample size
Sample size calculations	To ensure adequate power of the study	Calculating sample size
sample size calculations	I believe this is one of the most crucial aspects for validity of results	Calculating sample size
sample size calculations		Calculating sample size
sample size calculations	I believe this is one of the most crucial aspects for validity of results	Calculating sample size
sample size calculations	important for ensuring data validity	Calculating sample size
sample size calculations		Calculating sample size
sample size calculations	As above if the sample size calculations are wrong the trial may be meaningless	Calculating sample size
sample size calculations		Calculating sample size
sample size calculations		Calculating sample size
sample size calculations	calculating sample size for such designs to provide powered comaprisons	Calculating sample size
sample size calculations		Calculating sample size
sample size calculations	Important to have the right sample size to be able to make a good conclusion in the communities when you did studies. because you can't recruit all people in the study so for that you need the correct number ho can represent appropriatly everyone.	Calculating sample size
sample size calculations		Calculating sample size
sample size calculations	sample size is a litte complex, it decided the meaning of reseach	Calculating sample size
sample size calculations	this may be tricky as the cost of conducting the trial might lead to under sampling	Calculating sample size
sample size calculations	it makes the results of the study more powerfull	Calculating sample size
sample size calculations		Calculating sample size
Sample size calculations in relation to analysis	still often too small and erroneous subgroup analyses that are underpowered	Calculating sample size
sample size calculations in the context of low prevalence	some infections/diseases are present in low prevalence but are severe in nature	Designs for rare diseases and smaller populations
sample size calculations.	0	Calculating sample size
sample size calculations.		Calculating sample size
Sample size caluculations	Balance between scienfitic requirment and finance and time.	Calculating sample size
Sample size determination	0	Calculating sample size
Sample size determination		Calculating sample size
Sample size determination and decision	Given the decrease in available funds, emphasis needs to be put on choosing the right size that will answer the research question while preventing wastage of resources	Calculating sample size
Sample Size determination without Epi studies	0	Calculating sample size
Sample size estimation	0	Calculating sample size
Sample size of calculation	This issue affect the costs. Spend the least money to get the maximum benefit.	Calculating sample size
Sample sizes for implementation studies		Calculating sample size
sampling	0	Methods to boost recruitment
sampling and recruitment	often biases are built as the recruitment is through HCPs	Methods to boost recruitment
sampling instruments		Randomisation methods
sampling method		Randomisation methods
Sampling methodology in the absence of a sampling frame	This is a real-life problem	Representativeness in relation to inclusion/exclusion
Sampling methods		Representativeness in relation to inclusion/exclusion
Science communication and dissemination of results	Affected communities should know results and benefit from them	Methods of dissemination of findings
Scientific publication	0	Methods of dissemination of findings
scientifically reporting	Reporting is the scientific and reasonable analysis of the result of the trial design.	Trial reporting issues
selecting appropriate topics.	This is the most important in any studies	Choosing appropriate outcomes to measure
selecting more appropriate outcome measures	once outcome measures are selected, especially clinical ones, they are often taken up as infallible and immutable reflections of the 'truth' of whether the trial was effective or not. however, outcome measures are often not appropriate, responsive or meaningful to the intervention under investigation, especially if it a socially-based health systems or service intervention. we need more critical	Choosing appropriate outcomes to measure
Selection and training of field workers	0	Training of research staff
Selection criteria	0	Representativeness in relation to inclusion/exclusion
selection criteria	a good definition of selection criteria is key for the recruitment of subjects and adequate analysis and interpretation	Representativeness in relation to inclusion/exclusion
Selection of an appropriate study design	If a wrong design is chosen then the answers obtained will not be relevant/ informative as intended	N/A
Selection of participants	It is essential to understand the inclusion and exclusion criteria of the trial so as to reduce bias in the selection of participants.	Representativeness in relation to inclusion/exclusion
sequential clinical trials (including multi-arm, multi-stage adaptive trial designs) evaluating new or improved medical products	to reduce the burden of clinical trials in vulnerable population	Adaptive designs
service provision	0	N/A
Set of inclusion criteria and exclusion criteria		Representativeness in relation to inclusion/exclusion
sharing of data among partners	0	Data sharing
significance of trial objectives (to the region)	for its practicality	Choosing appropriate outcomes to measure
simplifying the methodology, making it not too different from the routine		Methods for streamlining trials
Slow release ARV's trials	The issue of pill burden has increased the fears of people to seek medical attention to help prevent early death. If slow release ARV's say those to be taken once in 3 month and at the same time making it impossible for HIV transmission, it would end the epidemic in 2-3 decades.	N/A
Small sample size	0	Calculating sample size
Smart inclusion / exclusion criteria.	To define the right participant population and facilitate recruitment without compromising safety.	Representativeness in relation to inclusion/exclusion
Social Cost studies	is so very important understand how do you identify costs from interventions	Methods for economic analysis
Social features, and social determinants	if you need work to scale outcomes, understand how social determinants impact health is very important	Social context
SOP design and adherence	To ensure high quality, replicable and consistent methods, data and processes	Adjusting for non-adherence to treatment protocol
SOPs for each step		N/A
Specified primary and secondary outcome measures	Before the study starts it is importante to know what and how the outcome will be measured	Choosing appropriate outcomes to measure
Sponsors	0	N/A
Sponsorship	0	N/A
Stadisticals methods		N/A
Staff training and motivation	0	Training of research staff
Stakeholder Engagement	I feel community mobilisation establishes relationship between researchers and the community	Community engagement
Standard for the Disign	Conduct	N/A
Standard Operating procedure	Important to having it forehand and sticking to it throughout the trial.	N/A
Standard operating procedures	These are crucial to the smooth running of a trial	N/A
Standardized outcome sets	Many trials on the same subject choose vastly different endpoints and reported outcomes. This makes it hard to compare studies on the same topic.	Choosing appropriate outcomes to measure
statistic design	0	N/A
Statistical Analysis	It is important for results reporting	N/A
Statistical analysis	0	N/A
Statistical analysis		N/A
Statistical analysis		N/A
Statistical analysis	Not all statisticians in LMICs are experienced in analysis of trials with complex design	N/A
statistical analysis	0	N/A
Statistical analysis and interpretation	To see if the different is detected and is significant	N/A
Statistical analysis for clinical trials.	0	N/A
Statistical analyze	0	N/A
Statistical assistance		N/A
Statistical background	0	N/A
Statistical design	The need to foster efficient designs	N/A
Statistical methods in precision medicine	Ties with the above above	N/A
Statistics	researchers should have basic statistical understanding in orde to be able to work with a statistician	N/A
statistics	The way to get the results	N/A
Statistics Analysis so as to proper understand the obtained data		N/A
statistics for trials reporting	very important in reporting huge trials data accrued	N/A
Statistics tips		N/A
Strategies to recruitment and follow-up	It is important to select the participant of the trial and also keep him until the end of the study	Methods to boost recruitment
strengthening capacity of research institutions in terms of providing insurance coverage to investigators for carrying out trials	in absence of funding from companies, researchers bear risk for any side effects	N/A
Strict design	the strict design will eventually help run the study smoothly and prevent bias	N/A
Studies within trials	To improve the efficiency of patient data	Studies nested within trials
Study design		N/A
Study design	This is not well understood by most of the researchers and especially how it influences the entire study	N/A
Study design		N/A
Study design	These are very key in implementation of a good CT study	N/A
Study design		N/A
Study design		N/A
Study design		N/A
Study design		N/A
Study design		N/A
Study design	This is an area where a researcher must make a balance between a design that can best best result and availability of resources especially funds. Another challenge here is usually how to get an acceptable placebo.	N/A
Study design		N/A
study design	the scientific intigrity of the study and the credibility of the data obteined from the study depend on the study design	N/A
study design	give direction to vital data to obtain	N/A
Study design in multi arm studies		Multi-arm, multi-stage trials
Study design/Protocol development	to make it possible to answer the research question	N/A
study duration in individual patients	"responders" all SD or PR or CR after end of study	Study duration
Study file		N/A
Study interpretation	0	N/A
Study methodology	0	N/A
Study Methods and procedures		N/A
study objectives	primary,secondary	Choosing appropriate outcomes to measure
Study objectives & variables		Choosing appropriate outcomes to measure
Study periode	0	Study duration
Study population	0	Representativeness in relation to inclusion/exclusion
Study procedures	0	N/A
Study protocal and procedures	It explain detail of the study and day routine of the activities of the staff in the clinical trial	N/A
study protocols	some are too rigid, not relevant to patients' practice	N/A
study reporting	0	Trial reporting issues
study site	Location of the study(not far away from the subjects)	N/A
subgroup analysis and adjusted analysis	0	N/A
subject recruitment and follow up	0	Methods to boost recruitment
Subject recruitment and retention	These are challenges that are not very often addressed until the clinical research is well underway. Challenges such transportation, outreach and patient support should be an integral part of clinical research in developing countries.	Methods to boost recruitment
subject recruitment program		Methods to boost recruitment
Subjects safety & ethics	0	N/A
Successful recruitment of trial patients	To meet the calculated sample size for the trial	Methods to boost recruitment
Suitability of sample size estimation for the chosen design	0	Calculating sample size
Supervision and inspection		Methods for trial monitoring
Supervision of data collection	0	Methods for data management
Supplement supply to participant	I choose this because I like to see the health of kids living with SCD get improvement and if possible to have better health. And to see the outcome of the supplements	N/A
supporting country health system research priorities		Identifying and prioritising relevant research topics
Surgery		N/A
Survey	0	N/A
Sustainability of follow ups in the studies for informed research	The more loss to follow ups especially in infectious diseases the more the spread and this affects the results as well.	Methods to minimise attrition
Systematic review and meta analysis	Identification of a scientifically sound research question	Choosing appropriate outcomes to measure
Systemic review and meta analysis		N/A
Teenagers pregnancy		N/A
The accuracy of statistical report in Health Management	Some reports or studies give just summary on findings but do not explain how the report has brought changes on the study topic	N/A
the analytic	to explain	N/A
The benefits of the research to the community	0	Incentives for trial participants
the contribution to the development of new vaccines	Furthermore we intend to contribute to the development of new vaccines (immunology) to take steps to ensure the safety of people	Vaccine trial designs
The different methods for conducting trials/trial study designs. Their applications and stregths and weaknesses		N/A
The duration and nature of research	0	Study duration
the future of malaria in developing countries case study Uganda	incidence has remained so high despite alot of resources invested in the area for eradication	N/A
The goal of the research		Choosing appropriate outcomes to measure
The inclusion and exclusion of sample	This topic directly determines the number of the population of the trail.	Representativeness in relation to inclusion/exclusion
The interventions for each group	It is important to know all the interventions in all groups in order to check if the study is really possible to be done in a site	N/A
The limitations of the research	0	N/A
The Methods for dealing with missing data	this is because no data is irelevant enough to be ignored	Methods for dealing with missing data
The need of a placebo comparative group for some kind of drugs		Use of placebo and its necessity
the open willingness of clients	This is good as the people make dicision with out any monetary influence	Informed consent processes
The right design of the study according to the target problem		N/A
the study stuff responsiveness	important to determine individual responsibility (for measuring of the disease status, tracking and maintaining of the study medication, laboratory testing, etc)	N/A
the time of each visit	The topic decides the compliance of subjects.	Methods to minimise attrition
the way to select sample	Ensure the accuracy of the study	Representativeness in relation to inclusion/exclusion
Time series hospital mortality rate to map out top cause for it		Access to and use of routine data
Timeline of clinical trials during epidemics	Relevance for rapid response to emerging infectious diseases	Methods for streamlining trials
to be part of the surveymonkey	to be part of the surveymonkey	N/A
To calculate risk benifit ratio for study participants		Identifying and prioritising relevant research topics
to define how to engage arge population in social trials	if you need to understand social outcomes and ethcis considferarions is very important to identify features from population	Representativeness in relation to inclusion/exclusion
To determine controls in social studies	when do you work in community in public helath is very important to identify control studies	Representativeness in relation to inclusion/exclusion
to determine the Inclusion and Exclusion criteria	This determines the crowd of trials.	Representativeness in relation to inclusion/exclusion
To evaluate the achievement on the use of ART regimes among pregnant and postpartum women with HIV infections	The trend of women taking ART during pregnancy and after delivery increase anually	N/A
To find Patient focused outcomes	To include the patient as soon as possible as a stakeholder evaluating its own health improvement	Choosing appropriate outcomes to measure
to improve my knowledge on trial	to improve my knowledge on trial	N/A
to limit the participation of investigational sites to the ones guaranteed by an institution	single investigators opening trial sites are without any third party control	N/A
To reduce number of participants	0	Calculating sample size
to reduce the number of useless data point requested by CRF	0	Methods for data capture
to select the most representative end point		Choosing appropriate outcomes to measure
To set accurate time points for active followup and sample collection		Methods to minimise attrition
To set up good trial halt rule		Interim analysis and stopping rules
Toxicology	0	N/A
Traceability of self-reported data by patients	Would be an important changes in data collection in trials	Patient reported outcomes
Trail designs	0	N/A
Training	Since clinical trial is a sensitive area, training should be enhanced to put trialist abreast with current issues and match up with advanced technologies emerging.	Training of research staff
Training around the processes for establishing tissue banks with prospective consent for research use and correlation with clinical data.	This is a minefield, but currently I believe we are denied knowledge which could be gained quickly and relatively cheaply by the lack of consented tissue resources.	Methods for ensuring better consent for samples
training clinicians on research methods	in my view, a widespread "culture" on clinical research methods is the pre-requisite for better research	Training of research staff
Training in good clinical practice for all researchers involved in clinical trials	Because some researchers breach ethical principles of research	N/A
training of health care providers on advantageous of clinical trials	Because providers are vital to have participants in cilincal trials	Training of research staff
training of research assistants	necessary	Training of research staff
Training of research group	0	Training of research staff
Training on GCP for the local trial team at Hope Medical Center done online and conference by by a team from the LSHTM	Choosen by the LSHTM	N/A
trasnparency in trial reporting	0	Trial reporting issues
trauma occlusion	0	N/A
Trial adherence and compliance (what it means!)	0	Adjusting for non-adherence to treatment protocol
Trial analysis	Production of accurate results	N/A
Trial and site feasibility	The need for clinical trials in developing countries are frequently thwarted by limitations in site development, set up and availability of appropriate equipment and resources. I would like to see clinical research development that ascertain and the path and continual support for sustainable clinical research conduct in developing countrires	Assessing site capacity
Trial Conduct	0	N/A
Trial conduct	Implementation of the trial enable analysis to be easily done	N/A
Trial conduct	Need for employing accurate methodology in conduct of trials	N/A
Trial conduct		N/A
Trial Design	There is need to involve LMIC more especially upcoming researchers to build capacity	N/A
Trial Design		N/A
Trial design		N/A
Trial design		N/A
Trial design		N/A
Trial design	Need for capacity building to improve healthcare	N/A
Trial design	This is a key area for a successful trial. If the design is practicable to the study area, there is a high chance that implementation will be done adequately.	N/A
Trial design	Proper design will lead to proper answer	N/A
Trial design	Fundamental of clinical trial	N/A
Trial design	The success of the clinical trial depends on proper design of the trial	N/A
Trial design		N/A
Trial design		N/A
Trial design		N/A
Trial design	many researchers in developing countries are not very knowledgeable in these areas. in many instances, the type of design used is not really reflected in the conduct of the study.	N/A
trial design	This has to be right to answer the question	N/A
trial design		N/A
trial design		N/A
trial design	having the appropriate design is key for the conduct and analysis	N/A
Trial design (baseline design upon trial objectives)		N/A
Trial design (e.g. adaptive/MAMS)	Accelerate progress from Phase II to Phase III	Adaptive designs
Trial design upon true local capacity (feasability)	0	N/A
Trial designs	The designs enable the conduct to be smooth	N/A
Trial designs		N/A
Trial designs		N/A
trial designs	training on the different trials designs	N/A
trial designs	training on the different trials designs	N/A
Trial designs in biosimilary medicines	0	N/A
trial designs of study	Decision on the success of the subject	N/A
trial designs,		N/A
Trial desing	0	N/A
trial efficiency		N/A
Trial environment	Provision should be made to enhance safety precautions at the trial site or probably the laboratory or any environment where the trial is taking place.	N/A
trial logistics	0	N/A
Trial methodology		N/A
Trial recruitment	To optimise recruitment strategies so that the trial is done in a quick, efficient and cost effective way with timely completion	Methods to boost recruitment
Trial recruitment in low-resource settings	0	Methods to boost recruitment
Trial reporting	In our setting this is rarely done	Trial reporting issues
Trial subjects management.	0	N/A
Trials "too rigid" for real life situations	We do not test molecules or vaccines only. People's behaviors can go in different areas.	Pragmatic (or "effectiveness") trials
Trials designs	To adapt trials designs for small size populacion	N/A
Trials in practice-based, low-resource settings		Trials in low-resource settings
Trials methodology	this is very important, if the method is not clair uou may have some misunderstanding of the patient recrutment, follow up et..	N/A
Trials monitoring		Methods for trial monitoring
Trials of Device	for diagnosis and research	Medical device trials
Trials of drug	Curative medicines investigation for both infectious and non infectious	Investigational medicinal product (IMP) trials
Trials of procedure	update and upgrading of existing procedures for research and daignosis	N/A
Trials of vaccine	prevention is better	Vaccine trial designs
Trials Research Design and Methodology	This forms the basis of the study	N/A
Trials to ensure proper use of antipsychotropics		N/A
Trials to increase participation of health workers in psychiatric research	To promote knowledge about mental health among health workers	N/A
Trials to promote good clinical research		N/A
triangulation of the data based routine primary and secondary data		Methods for data capture
Tropical diseases in development countries		N/A
Tropical Neglected diseases	Common in my country	N/A
Tuberculosis		N/A
Tuberculosis		N/A
type of design of clinical trials	0	N/A
type of questionairre	0	Questionnaire design
Type of study		N/A
Type of trial design used	0	N/A
Under Experimental studies, we can also concentrate on Phase 0 and Phase 1 studies	Starting from the grass root would be very beneficial because this would increase the knowledge base on research and reduce myths and misconceptions tied to research, hence participating in future research can be welcomed very well	Early phase trials
Understanding side effects of antipsychotropics		N/A
Understanding the methods used in double blinding drug testing studies		Methods of blinding
Usage of placebo to make it similar with experimental drug		Use of placebo and its necessity
Use of appropriate patient reported outcome measures (PROMS)	Many PROMS do not provide valuable information	Choosing appropriate outcomes to measure
Use of Biomarkers	0	Biomarkers stratification
Use of preference based outcome measures (utility instruments)	Without these, economic evaluations are seriously flawed, yet they are easy and cheap to use	Methods for economic analysis
Use the appropriate tools (images...) to explain the research to participants	It so important for the success of the research to better explain it to participants	Informed consent processes
Vaccination trail design for country	0	Vaccine trial designs
Vaccine trials design	0	Vaccine trial designs
Validity of the study	To ensure variable under the study is relevant, generalized and they are applicable in different sittings.	Identifying and prioritising relevant research topics
variable definition		N/A
various practices	There is need for good manufacturing practice in the preparation of the trial products; good laboratory and clinical practices during the conduct of the study.	N/A
vertical dimension		N/A
Voluntariness in informed consent	Because of the importance to avoid exploitation of individuals	Informed consent processes
voluntary participation	subject need not to be coarsed/ forced to participate	Informed consent processes
Waivers of informed consent, novel consent strategies	0	Informed consent processes
We do not have the culture for leading clinical trials	Clinical Trials are expensive. We have so many needs to fulfill that these trials are seen as a luxury.	N/A
We do not have the infrastructure to make clinical trials	To do these you need to have the right team for the needed period of time.	Trials in low-resource settings
We need more training on Clinical Research	Because most clinical trials are designed in developed countries.	Training of research staff
Well defined protocol based on CONSORT	To ensure comprehensiveness	N/A
what are potentials for post trial harmony	0	N/A
What work is already being done ?	to determine the importance of the question being asked	Identifying and prioritising relevant research topics
Where to publish?		Methods of dissemination of findings
with this survey I will be able to deliver better trail survey	with this survey I will be able to deliver better trail survey	N/A
working as part of interdisciplinary trial teams - how different disciplines contribute and collaborate (including qualitative and quantitative research)	0	N/A
Writing grant applications	Nothing happens without money... Many people are good at this. Those who aren't get nowhere. Good teaching including how to write a logical framework matrix and sort out objectives, outcomes etc would be useful.	N/A
ZOONOTIC DISEASES	Such diseases are highly neglected. The fact is that there is a high human- animal interaction in Zambia putting it a high risk factor to zoonotic diseases	N/A
